# Supplementary material for: Two-step conversion of uridine and cytidine to variously C5-C functionalized analogs
Source: Royal Society of Chemistry journal article supplement (doi:10.1039/d3ob00161j), 2023-01-01
Supplement: d3ob00161j1.pdf [file d3ob00161j1.pdf]

## Supporting information

# Two-step conversion of uridine and cytidine to variously C5-C functionalized analogs

Karolina Podskoczyj, Anna Klos, Szymon Drewniak, Grazyna Leszczynska

*Institute of Organic Chemistry, Lodz University of Technology, Zeromskiego 116, 90-924 Lodz, Poland*  
E-mail: [grazyna.leszczynska@p.lodz.pl](mailto:grazyna.leszczynska@p.lodz.pl)

## Table of Contents

|                                                                                                                 |    |
|-----------------------------------------------------------------------------------------------------------------|----|
| 1. Spectral analysis of synthesized compounds.....                                                              | 2  |
| 1.1. <sup>1</sup> H, <sup>13</sup> C and <sup>19</sup> F NMR spectra of compounds <b>2a</b> and <b>2b</b> ..... | 2  |
| 1.2. IR and NMR spectra of uridine derivatives <b>3a-7a</b> .....                                               | 8  |
| 1.3. IR and NMR spectra of cytidine derivatives <b>3b-6b</b> .....                                              | 24 |

# 1. Spectral analysis of synthesized compounds

## 1.1. $^1\text{H}$ , $^{13}\text{C}$ and $^{19}\text{F}$ NMR spectra of compounds 2a and 2b

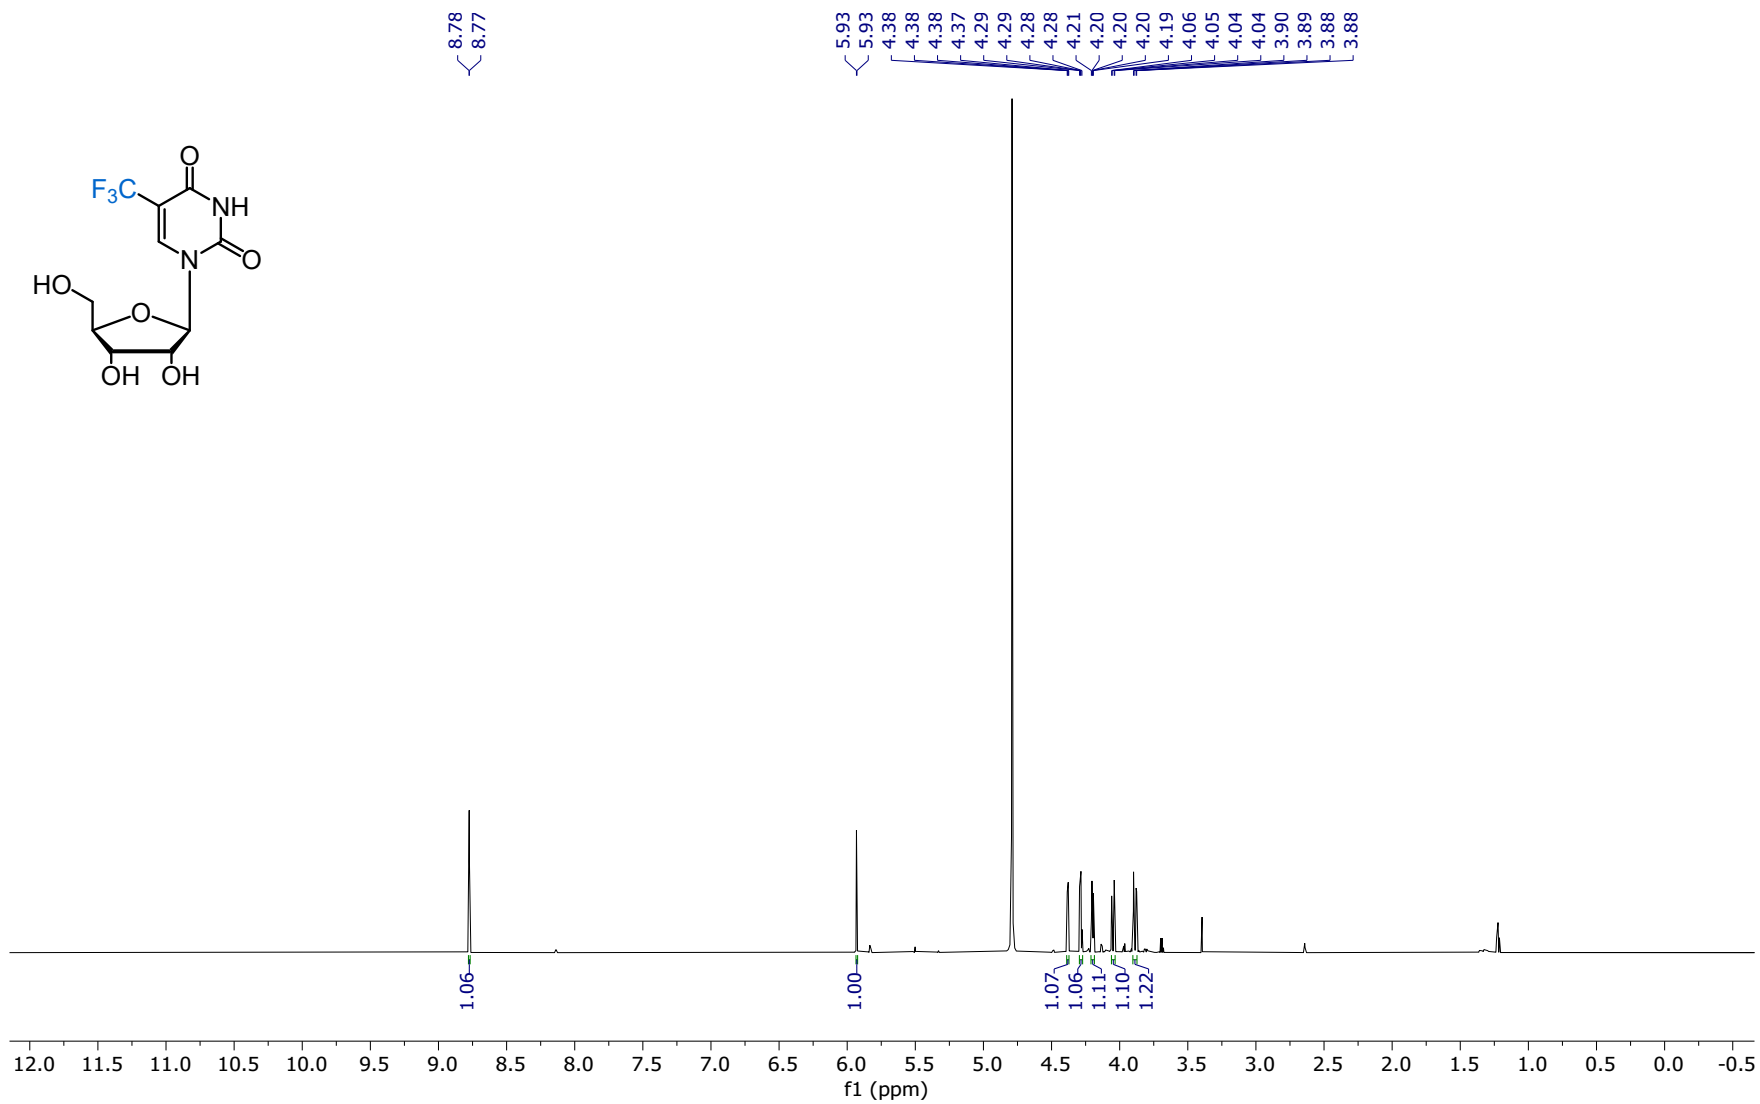

Figure S1.  $^1\text{H}$  NMR spectrum of 2a (700 MHz,  $\text{D}_2\text{O}$ ).

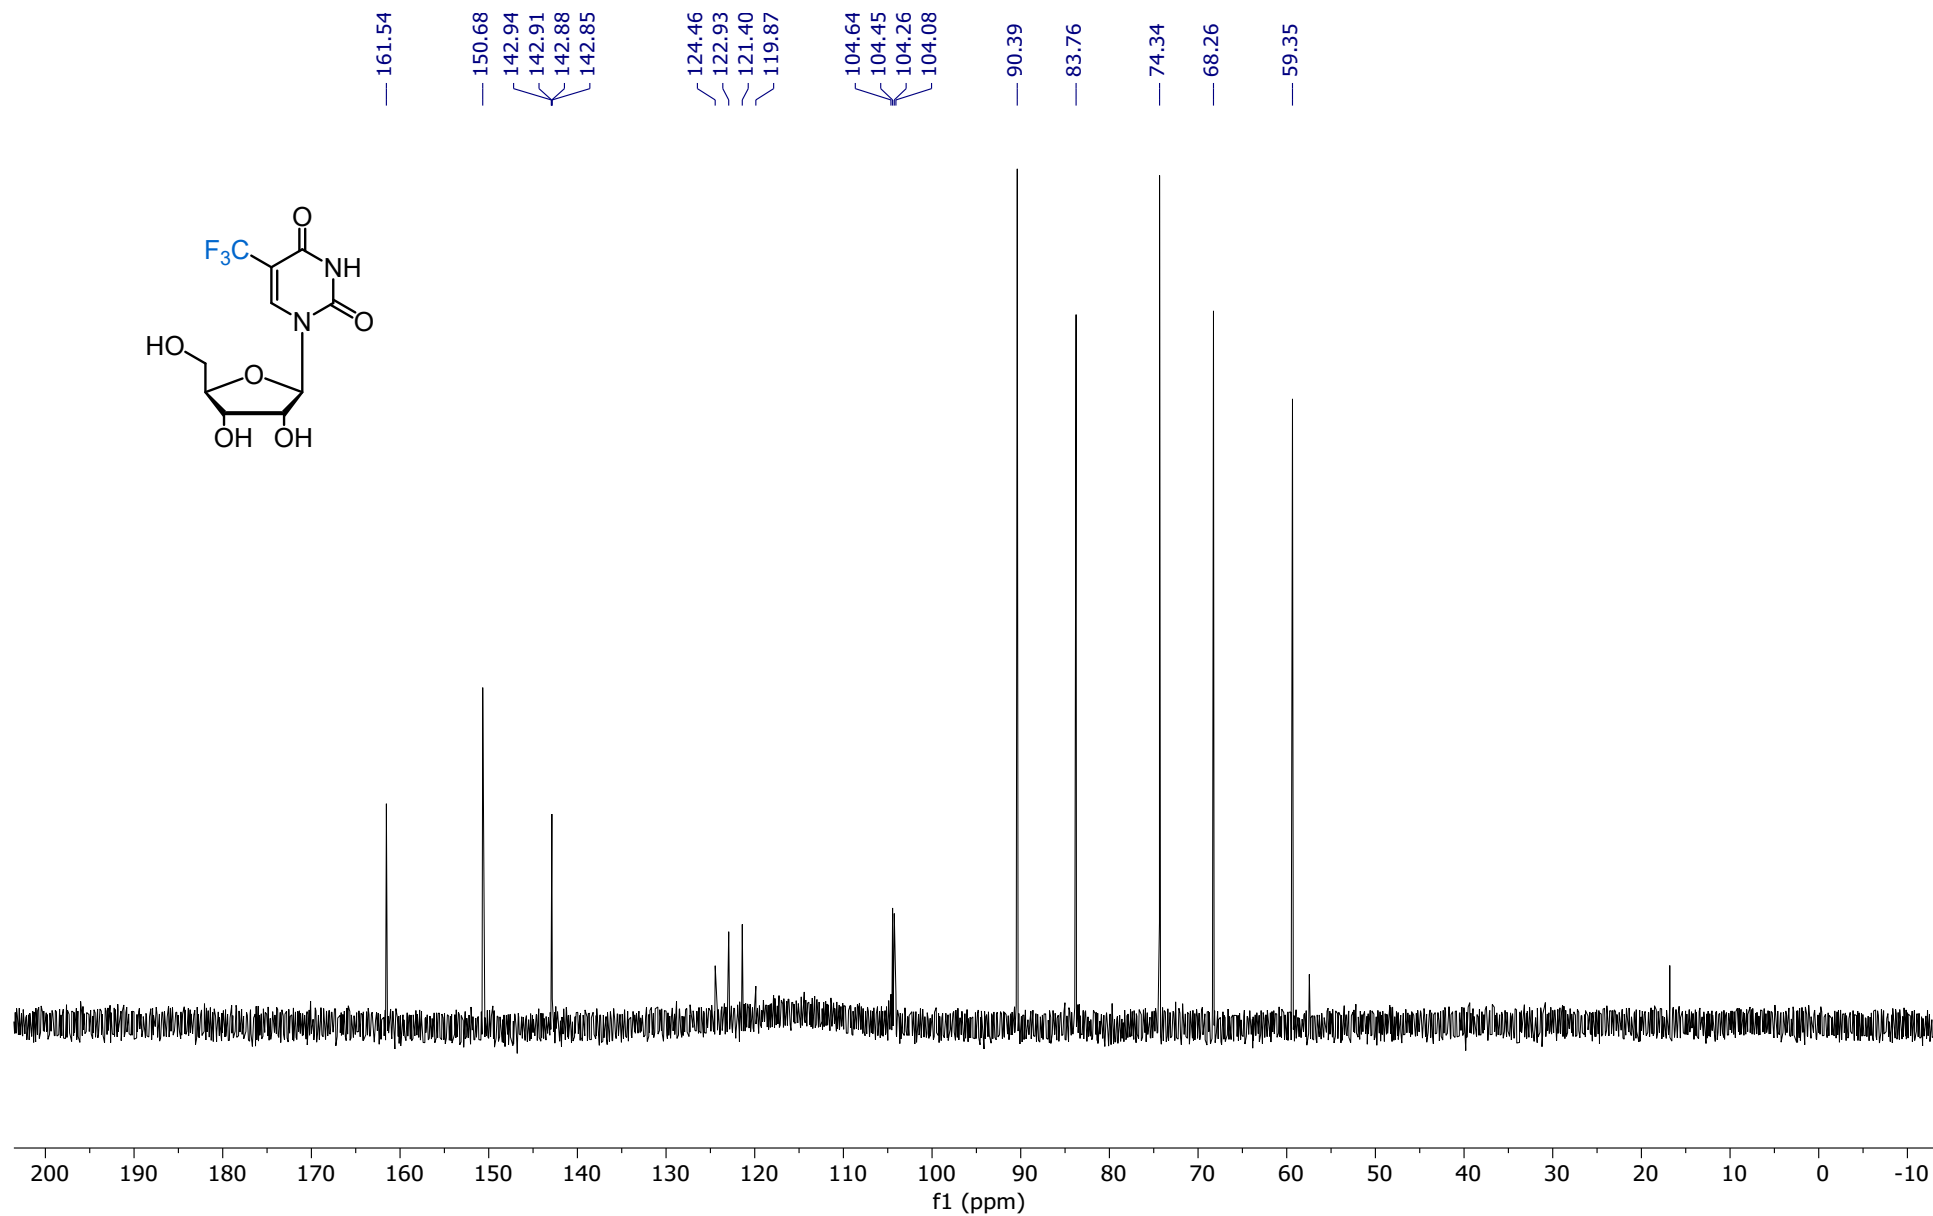

**Figure S2.**  $^{13}\text{C}$  NMR spectrum of **2a** (176 MHz,  $\text{D}_2\text{O}$ ).

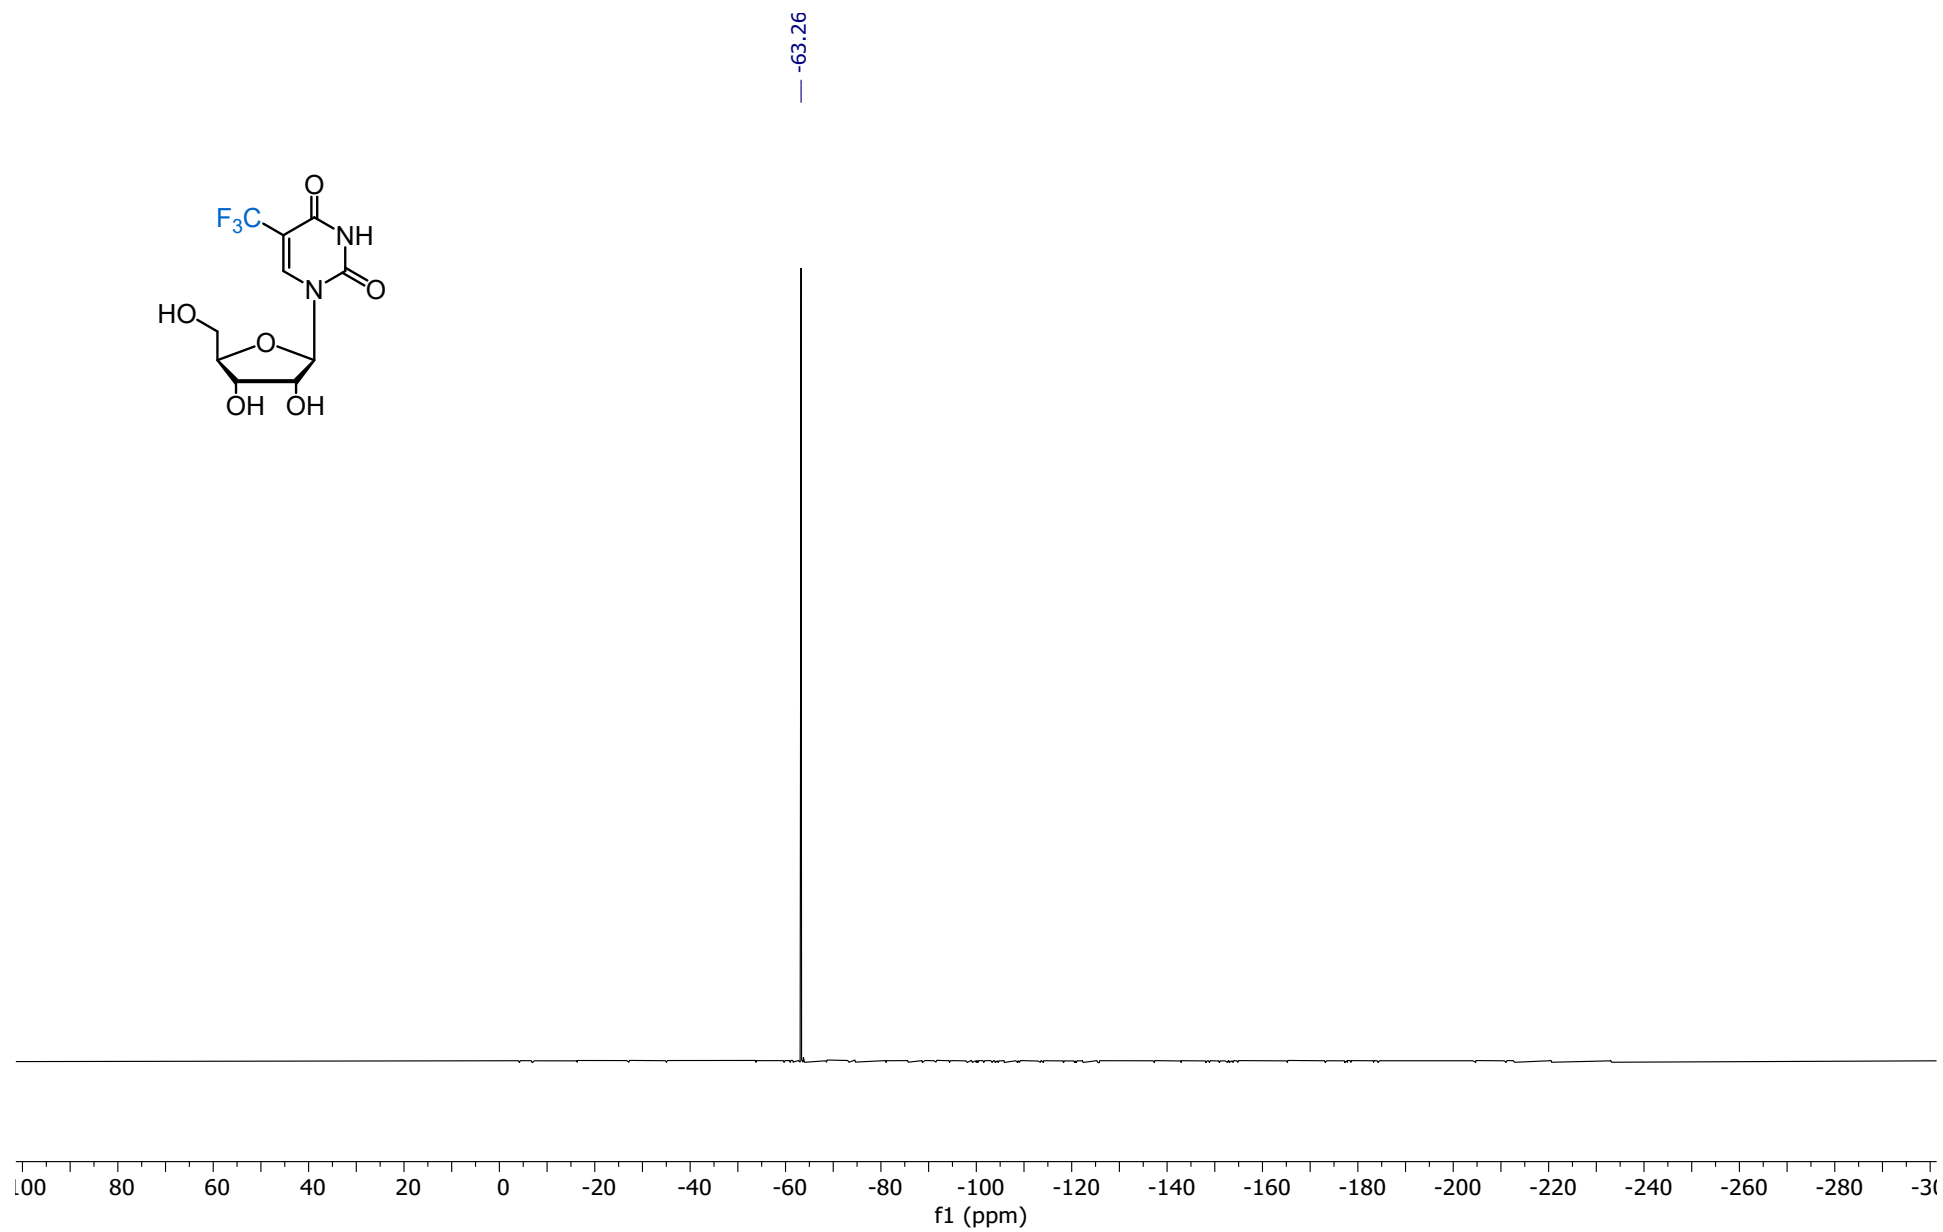

**Figure S3.**  $^{19}\text{F}$  NMR spectrum of **2a** (376 MHz,  $\text{D}_2\text{O}$ ).

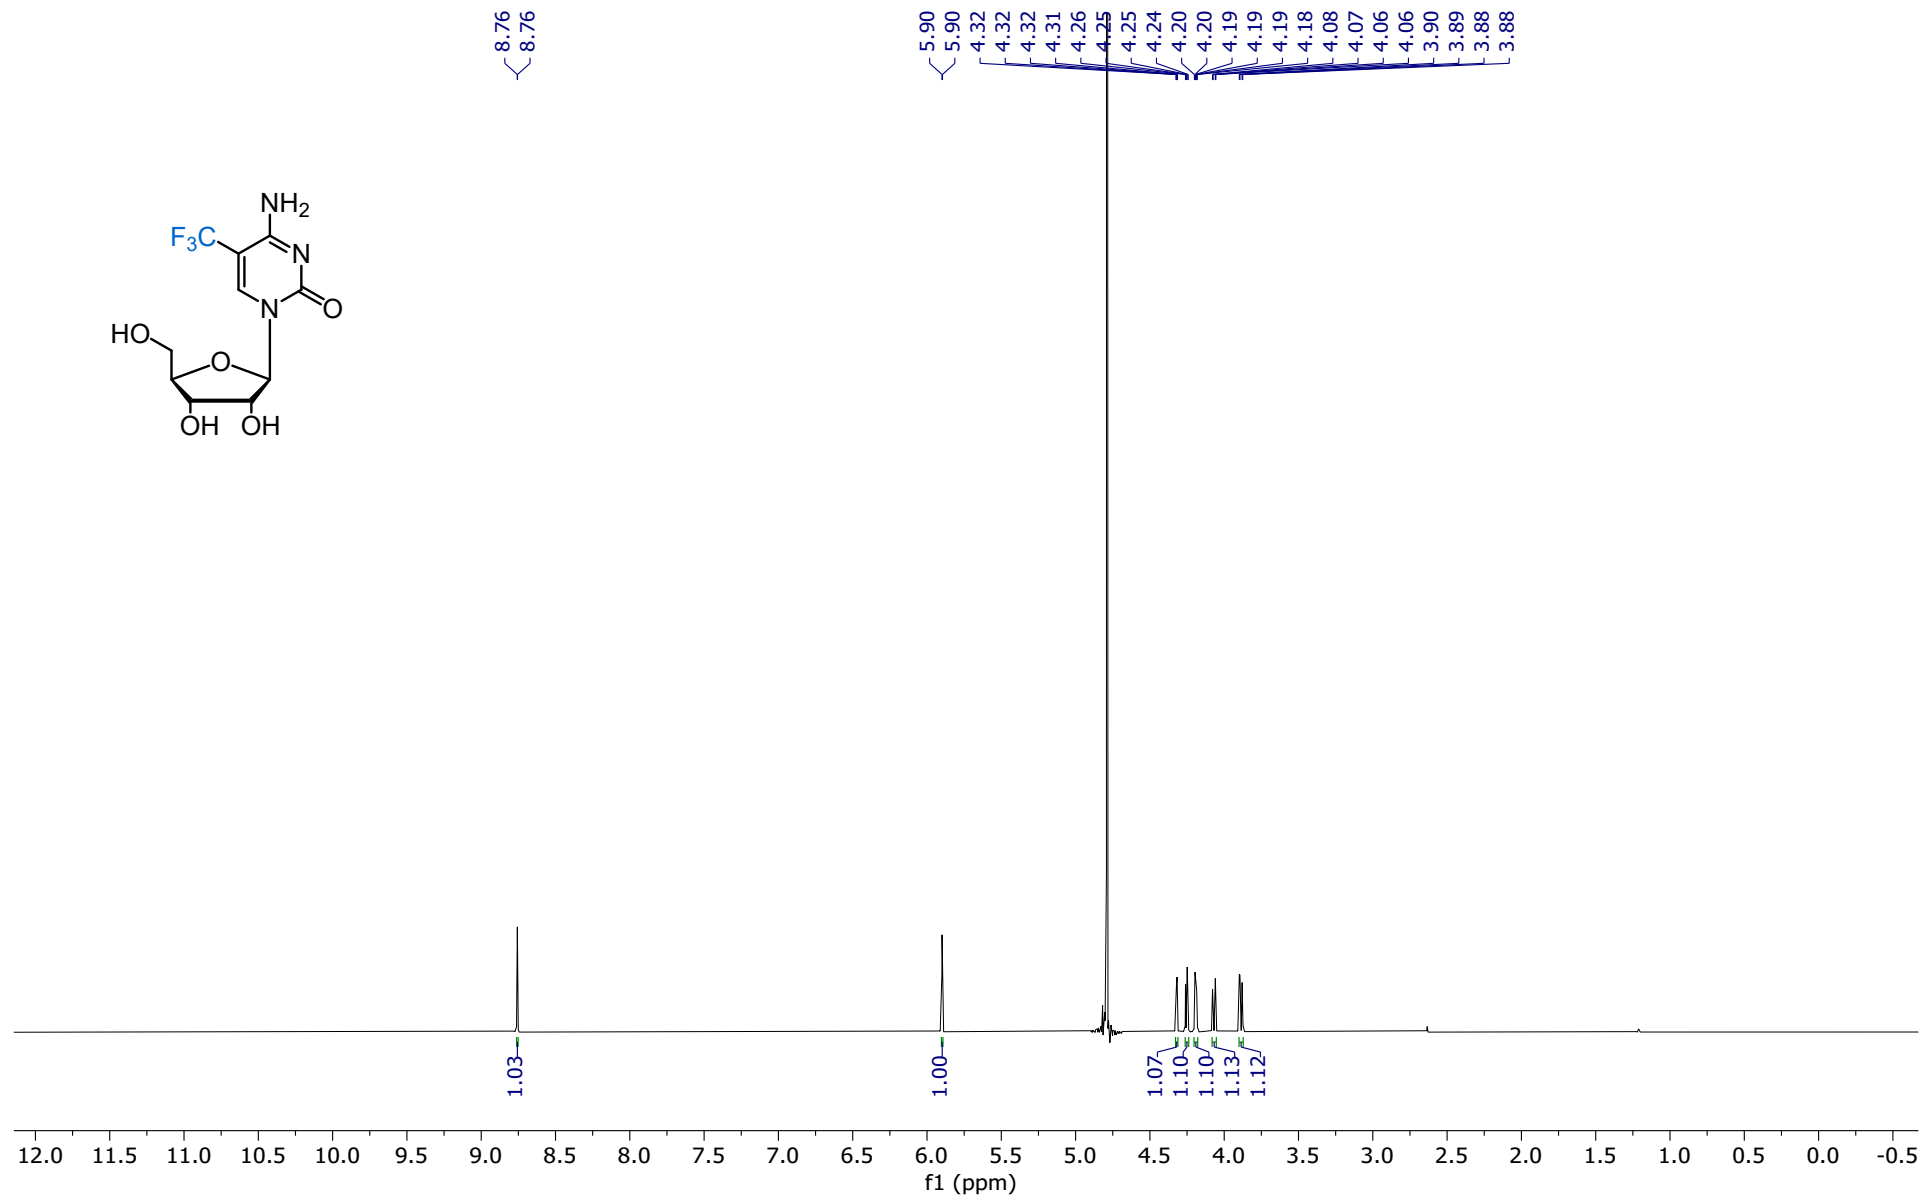

**Figure S4.** <sup>1</sup>H NMR spectrum of **2b** (700 MHz, D<sub>2</sub>O).

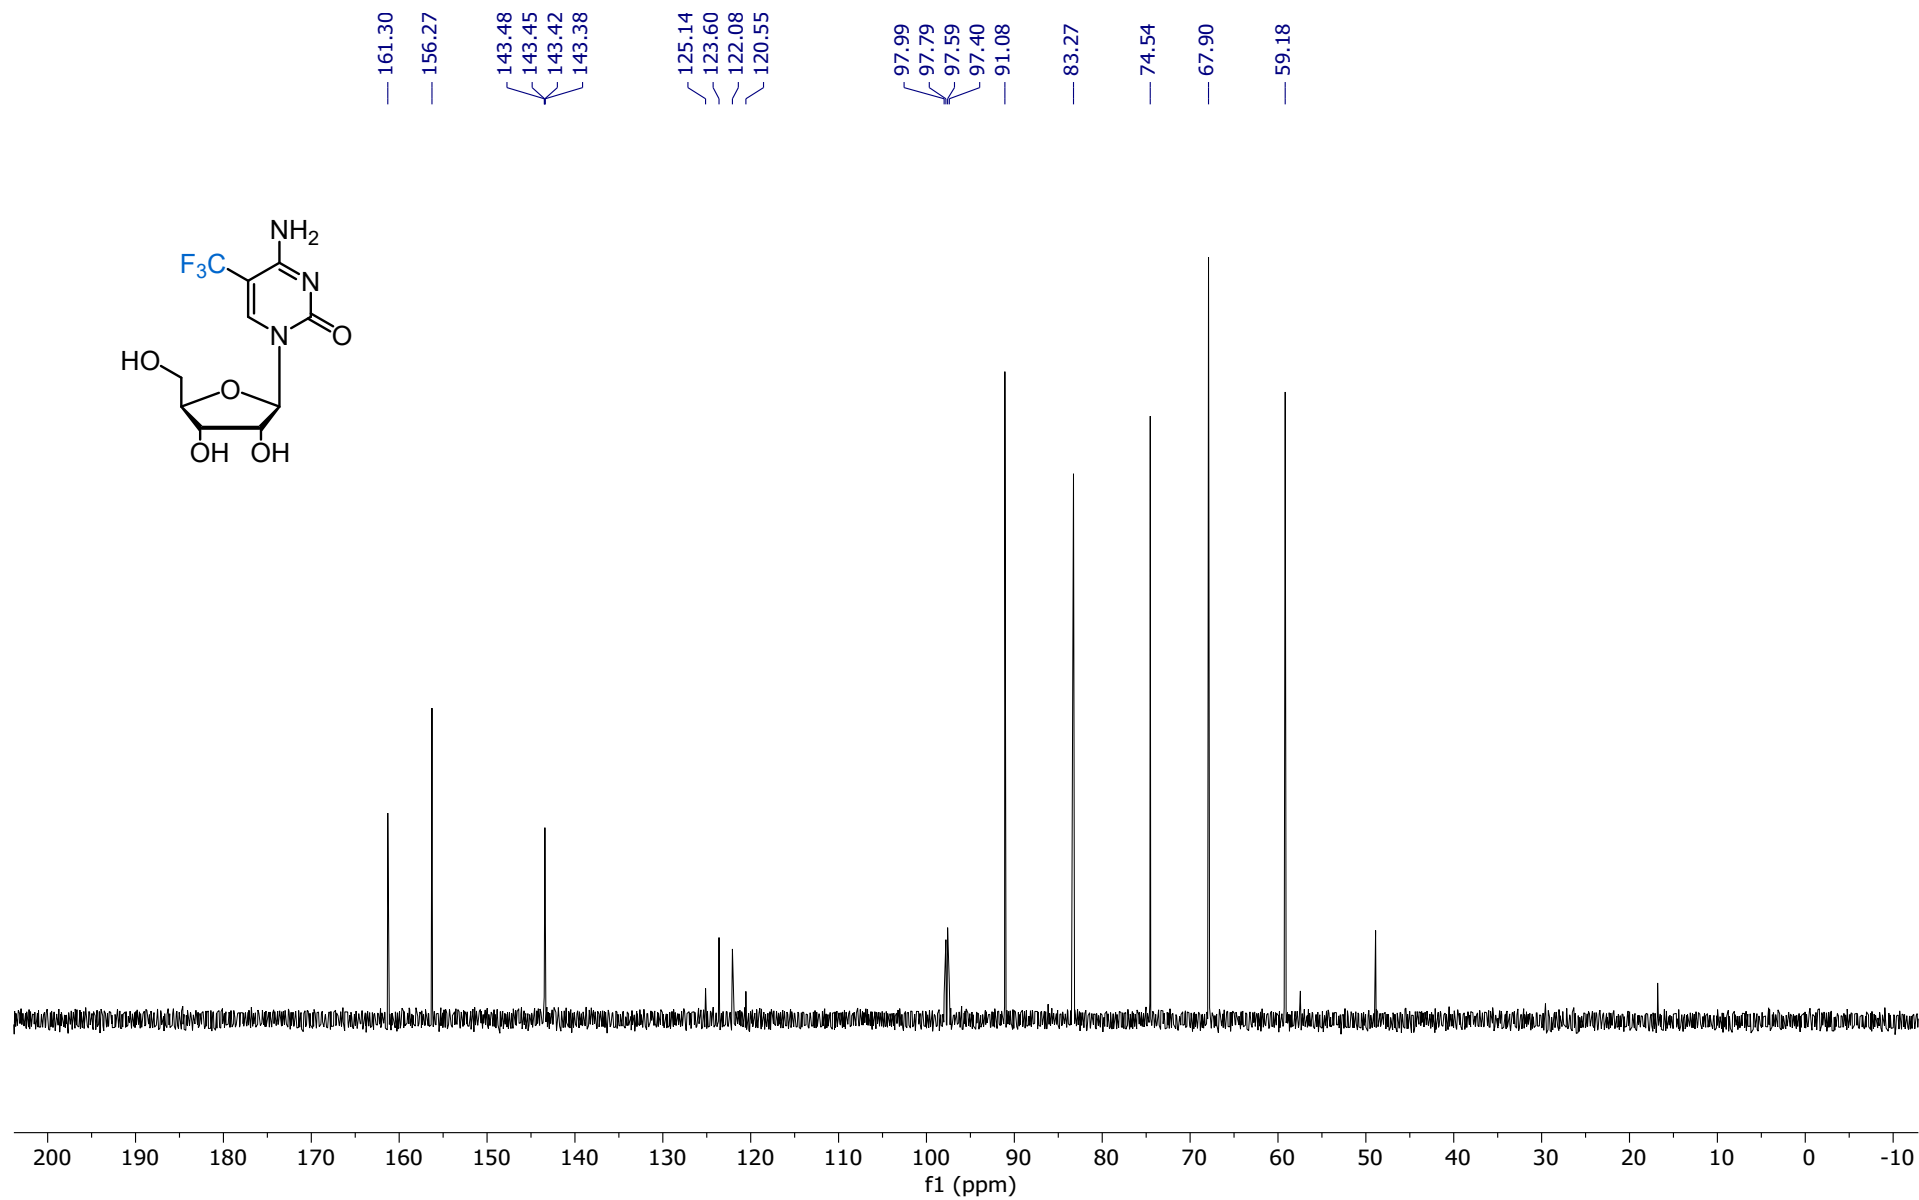

Figure S5. <sup>13</sup>C NMR spectrum of **2b** (176 MHz, D<sub>2</sub>O).

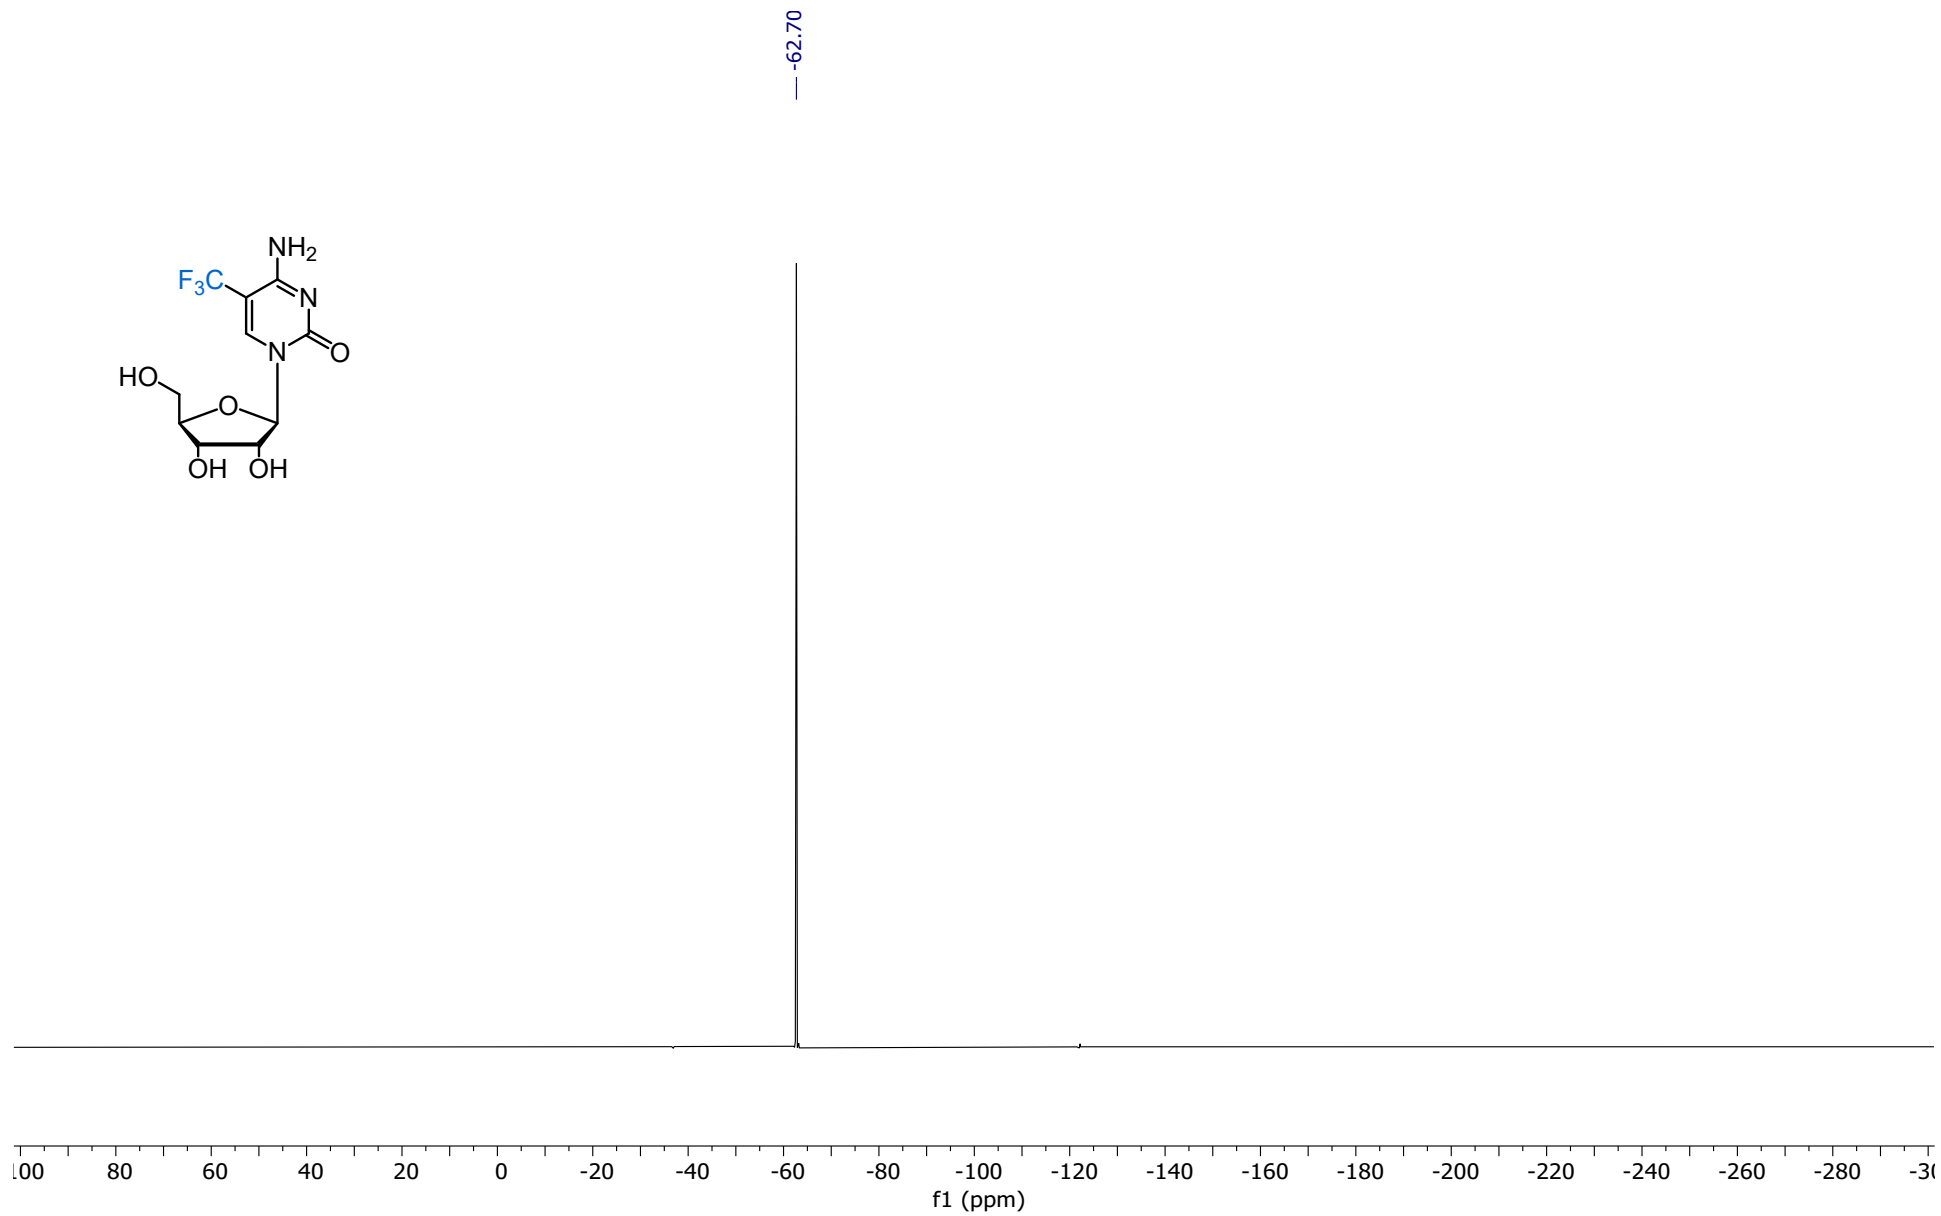

**Figure S6.**  $^{19}\text{F}$  NMR spectrum of **2b** (376 MHz,  $\text{D}_2\text{O}$ ).

## 1.2. IR and NMR spectra of uridine derivatives 3a-7a

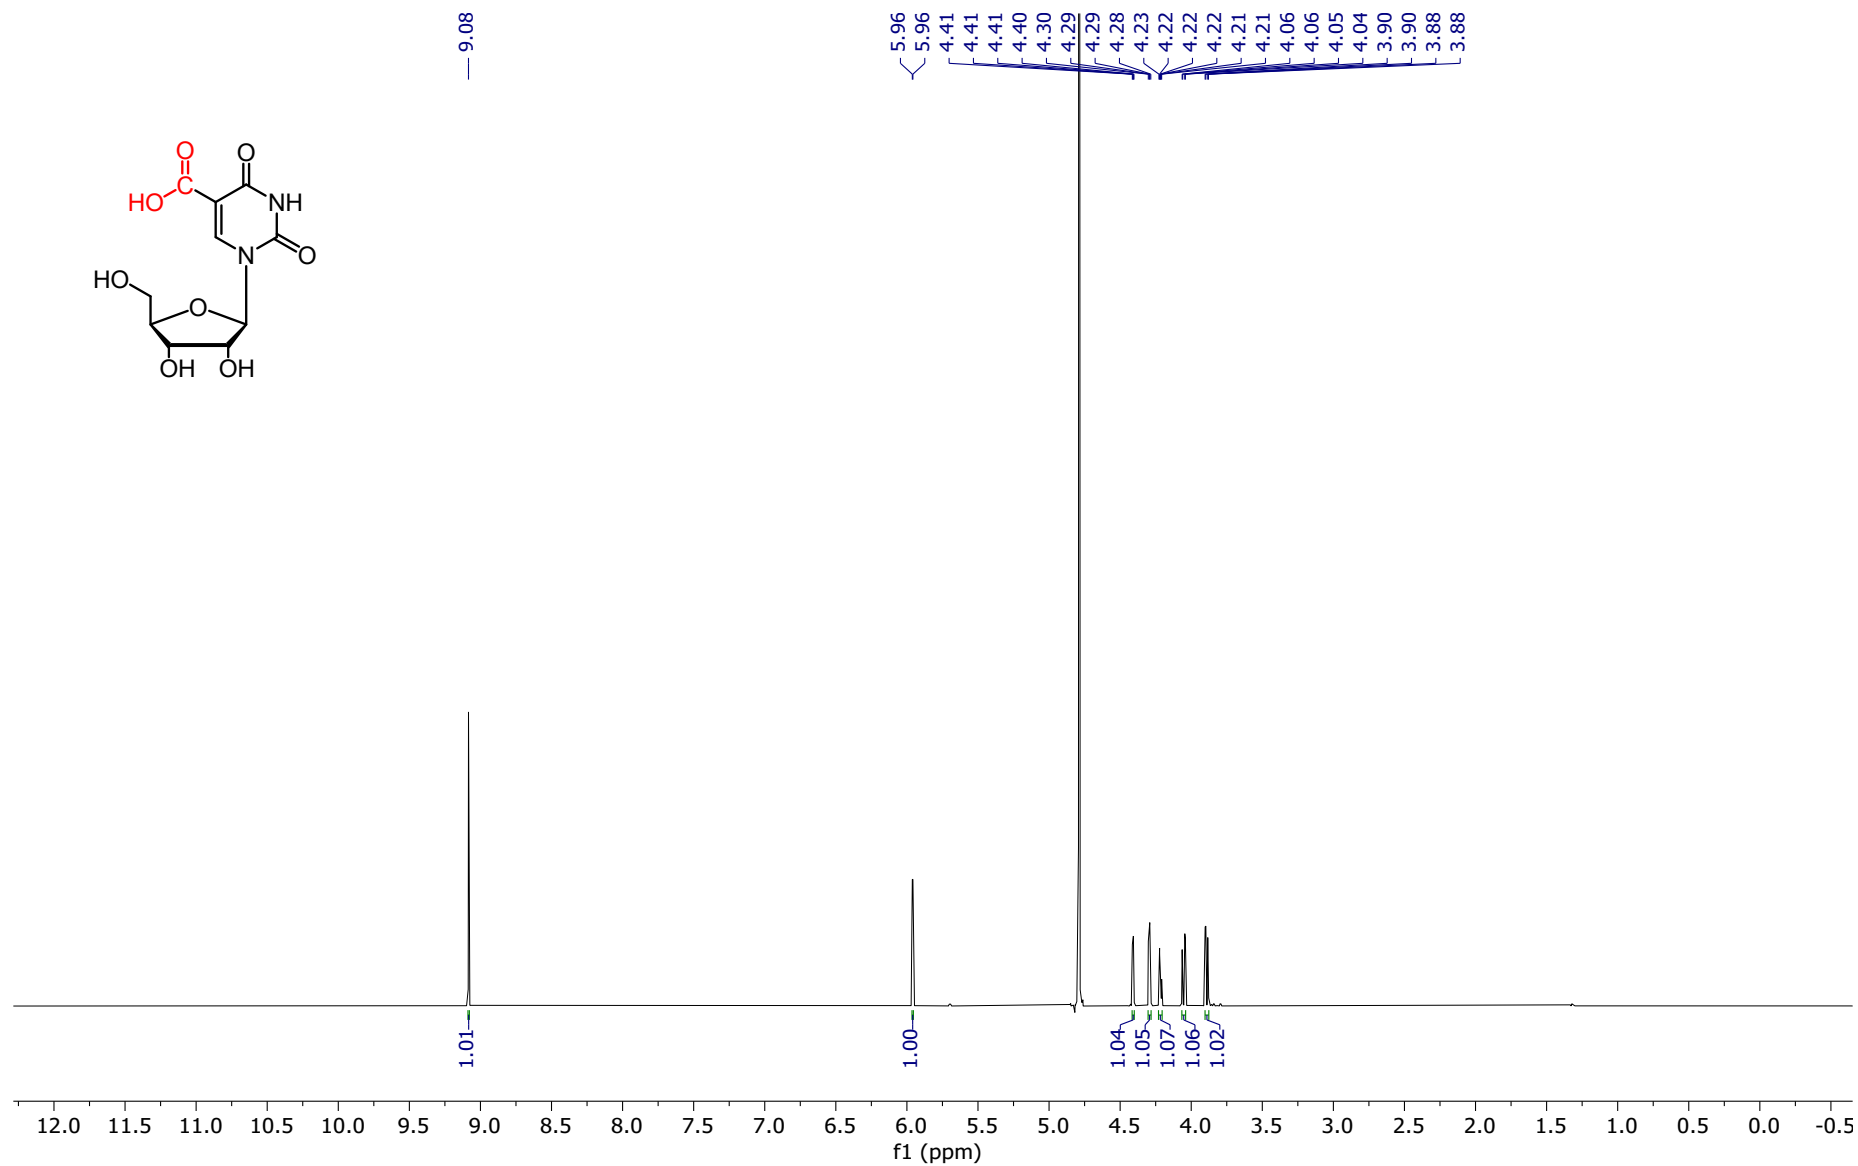

**Figure S7.** <sup>1</sup>H NMR spectrum of **3a** (700 MHz, D<sub>2</sub>O).



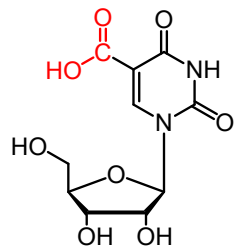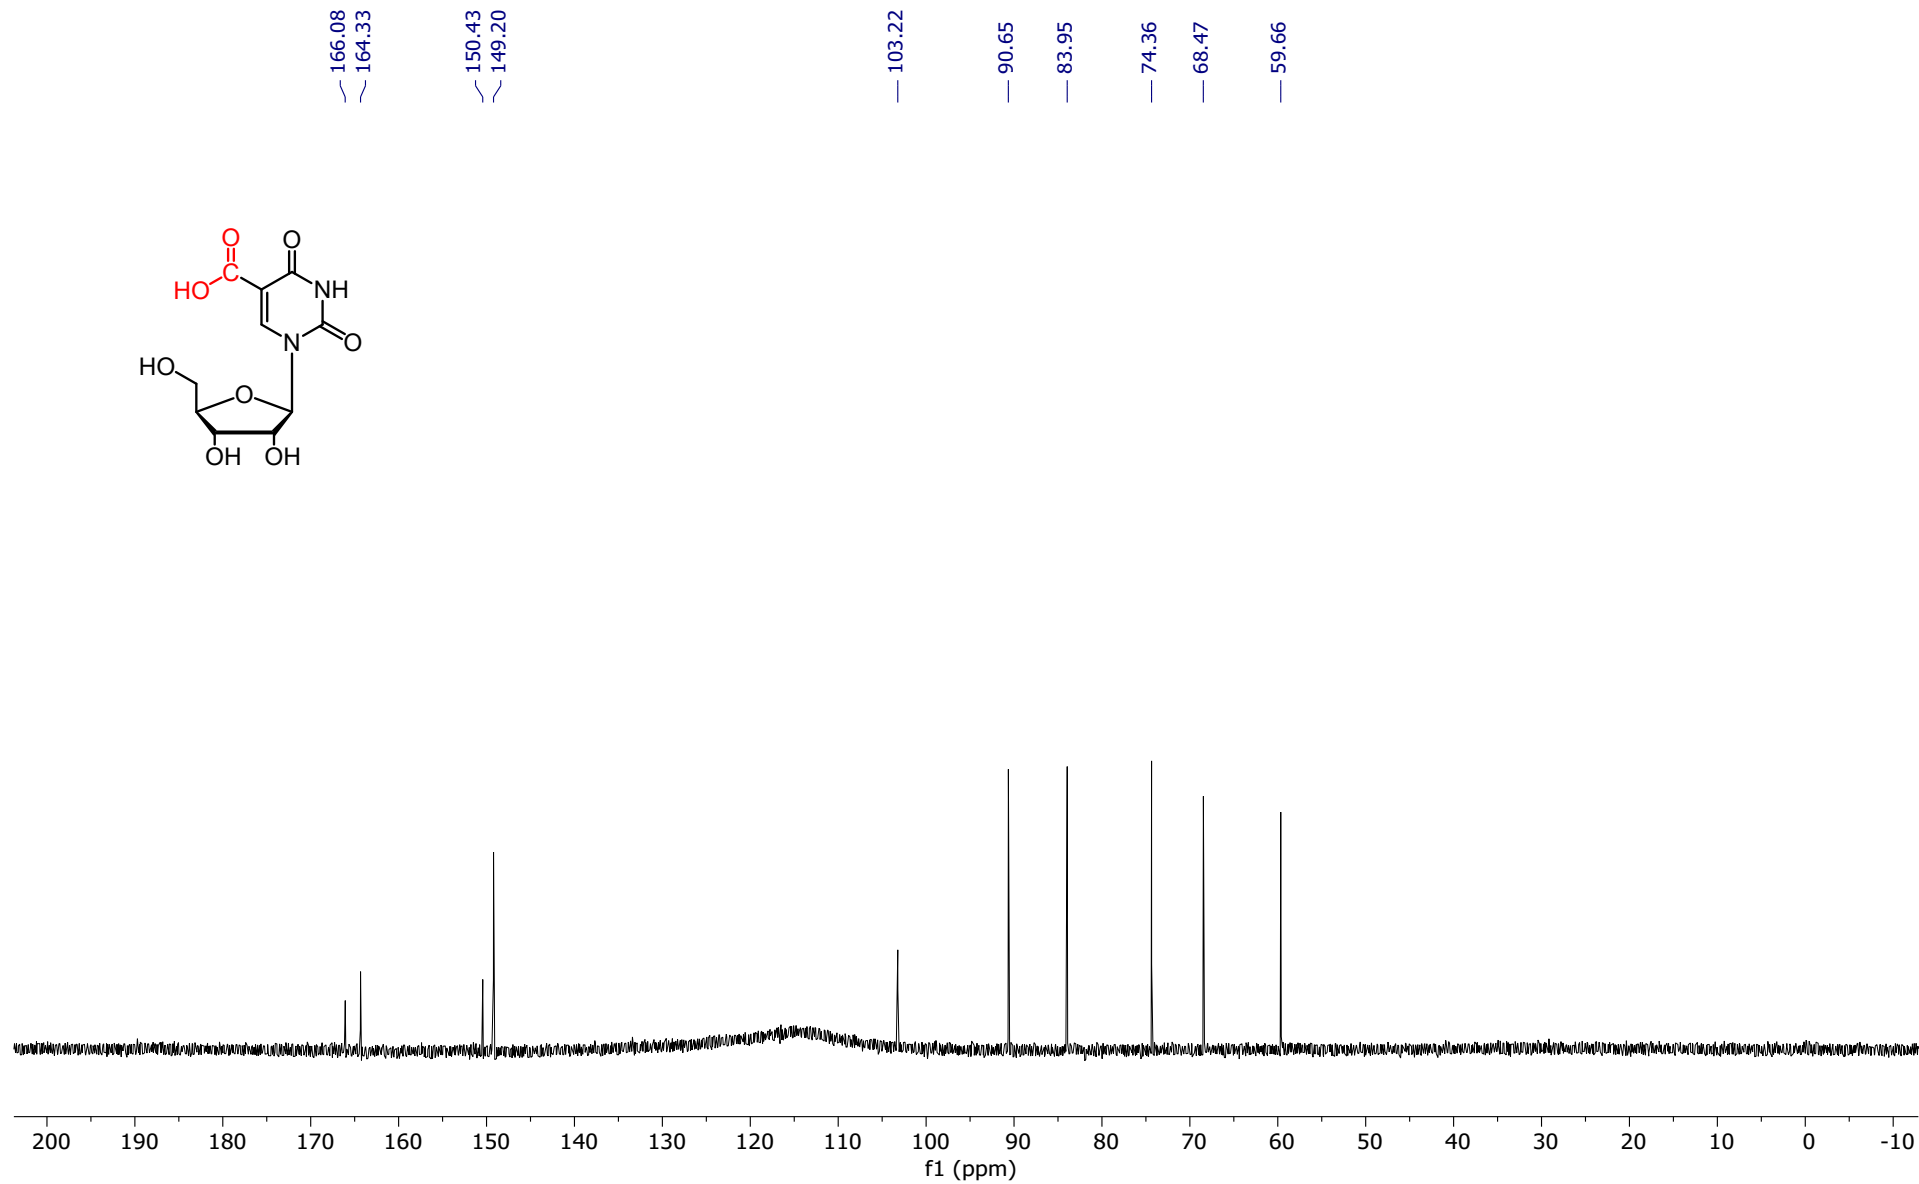

Figure S8.  $^{13}\text{C}$  NMR spectrum of 3a (176 MHz,  $\text{D}_2\text{O}$ )

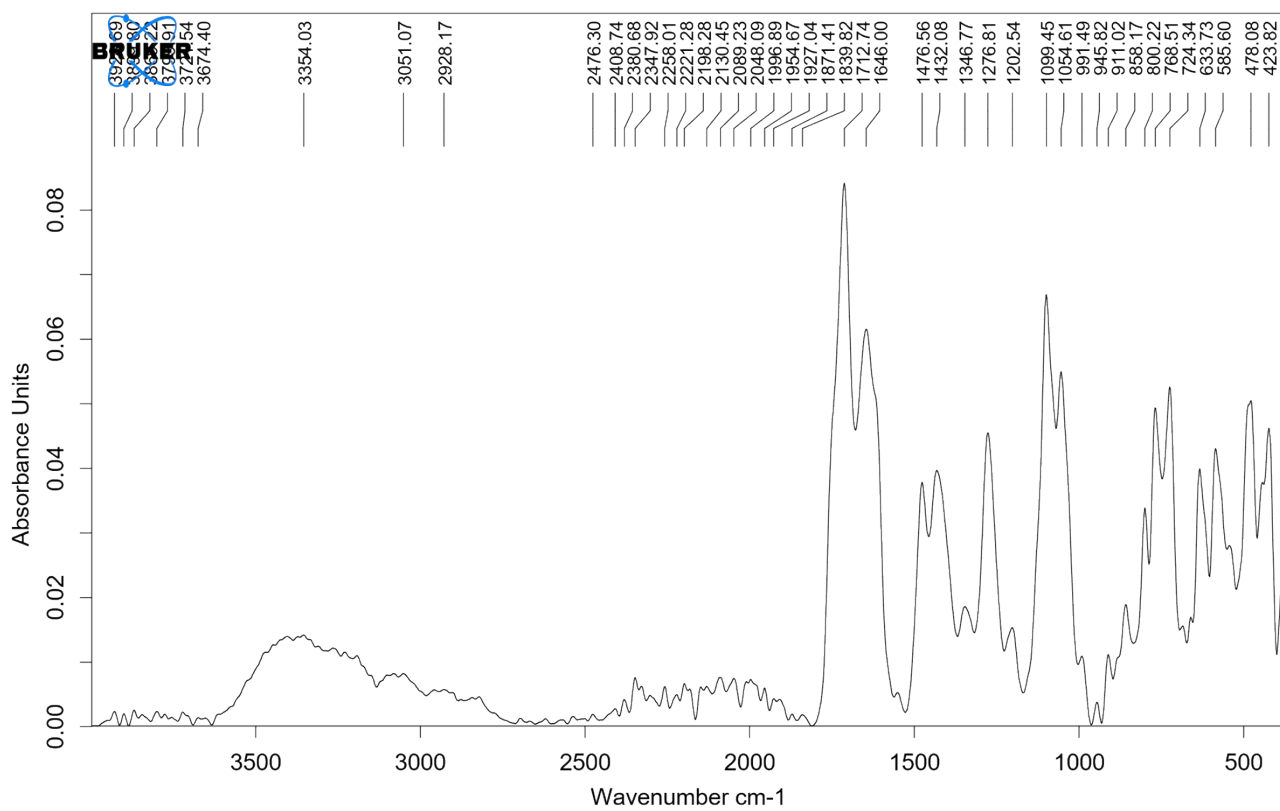

Figure S9. IR spectrum of 5-carboxyuridine (**3a**).

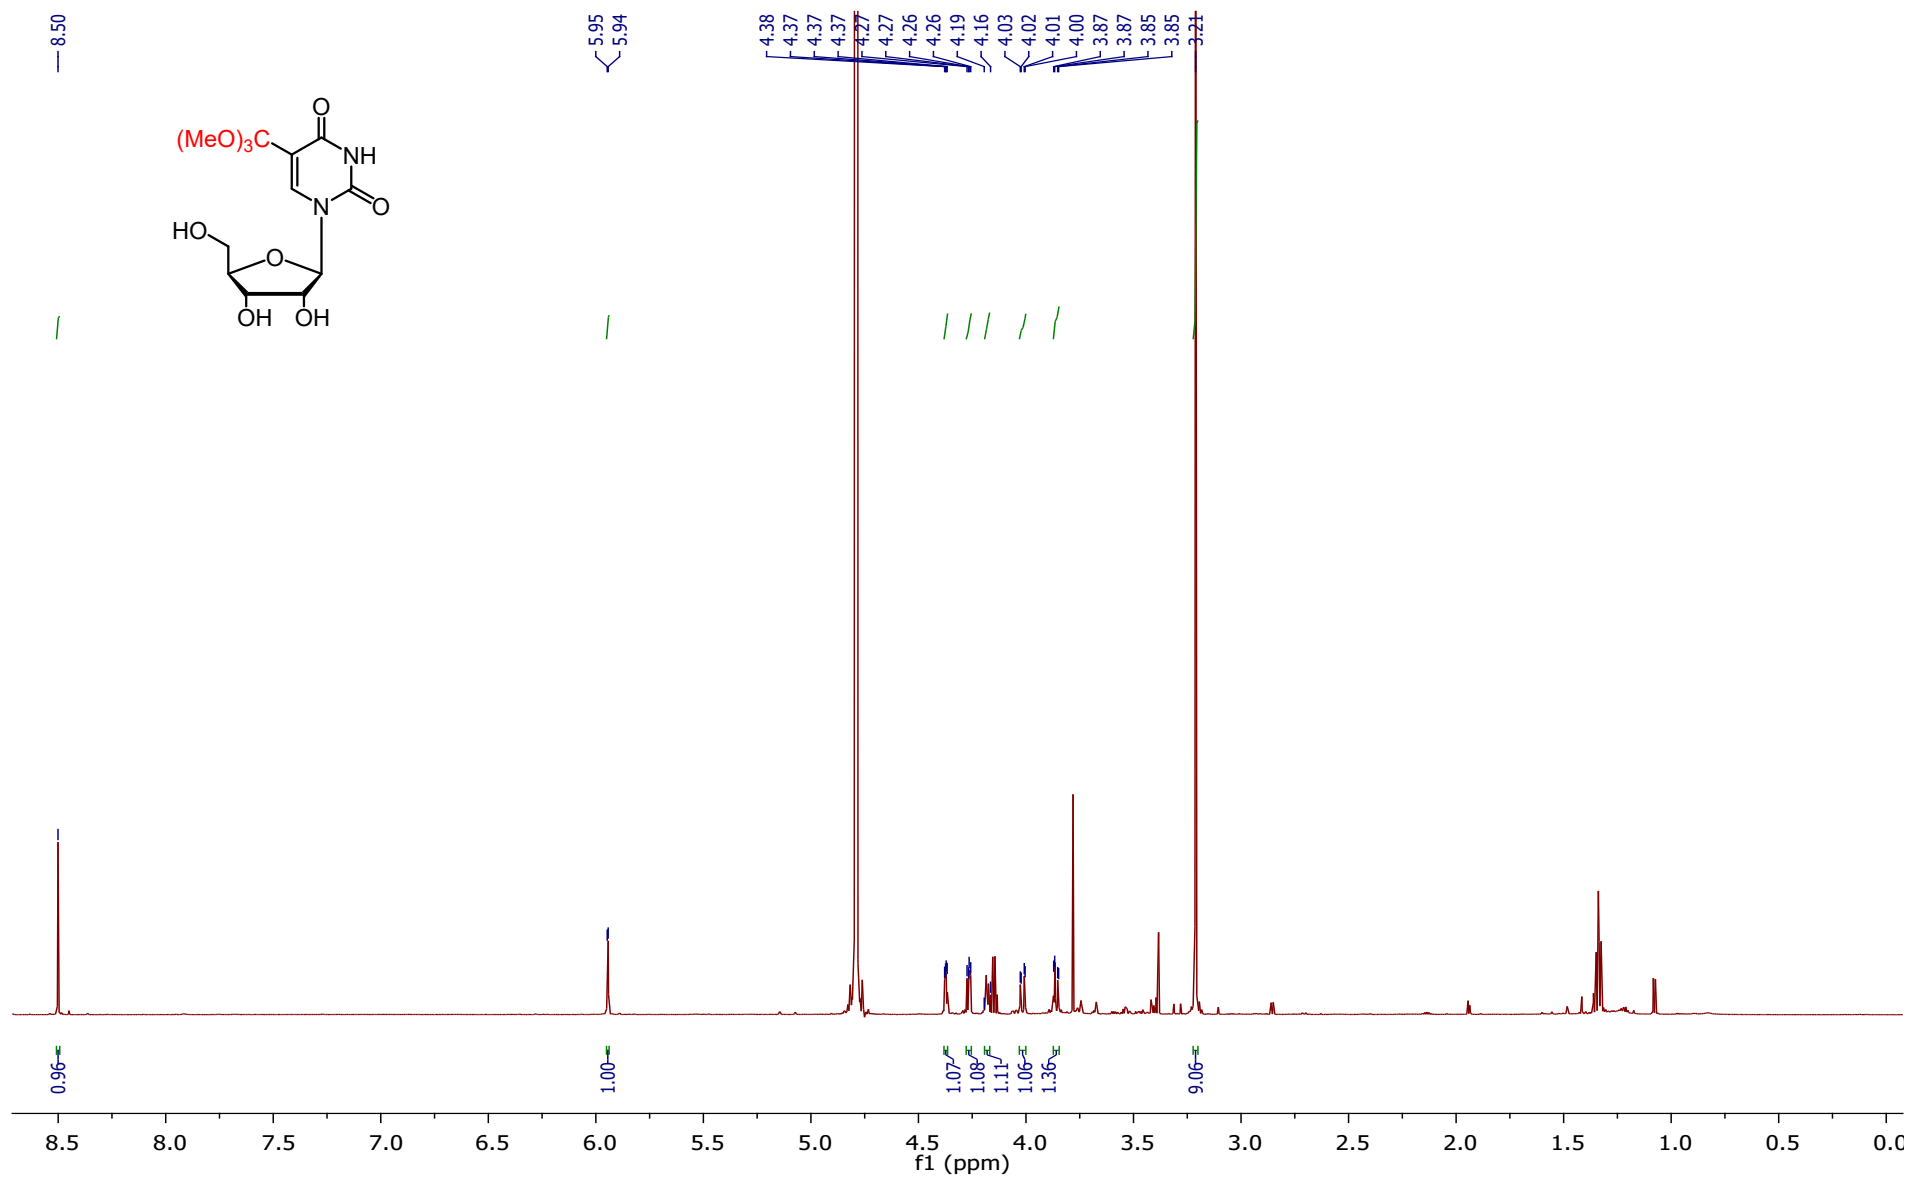

**Figure S10.** <sup>1</sup>H NMR spectrum of 5-(trimethoxymethyl)uridine (700 MHz, D<sub>2</sub>O).

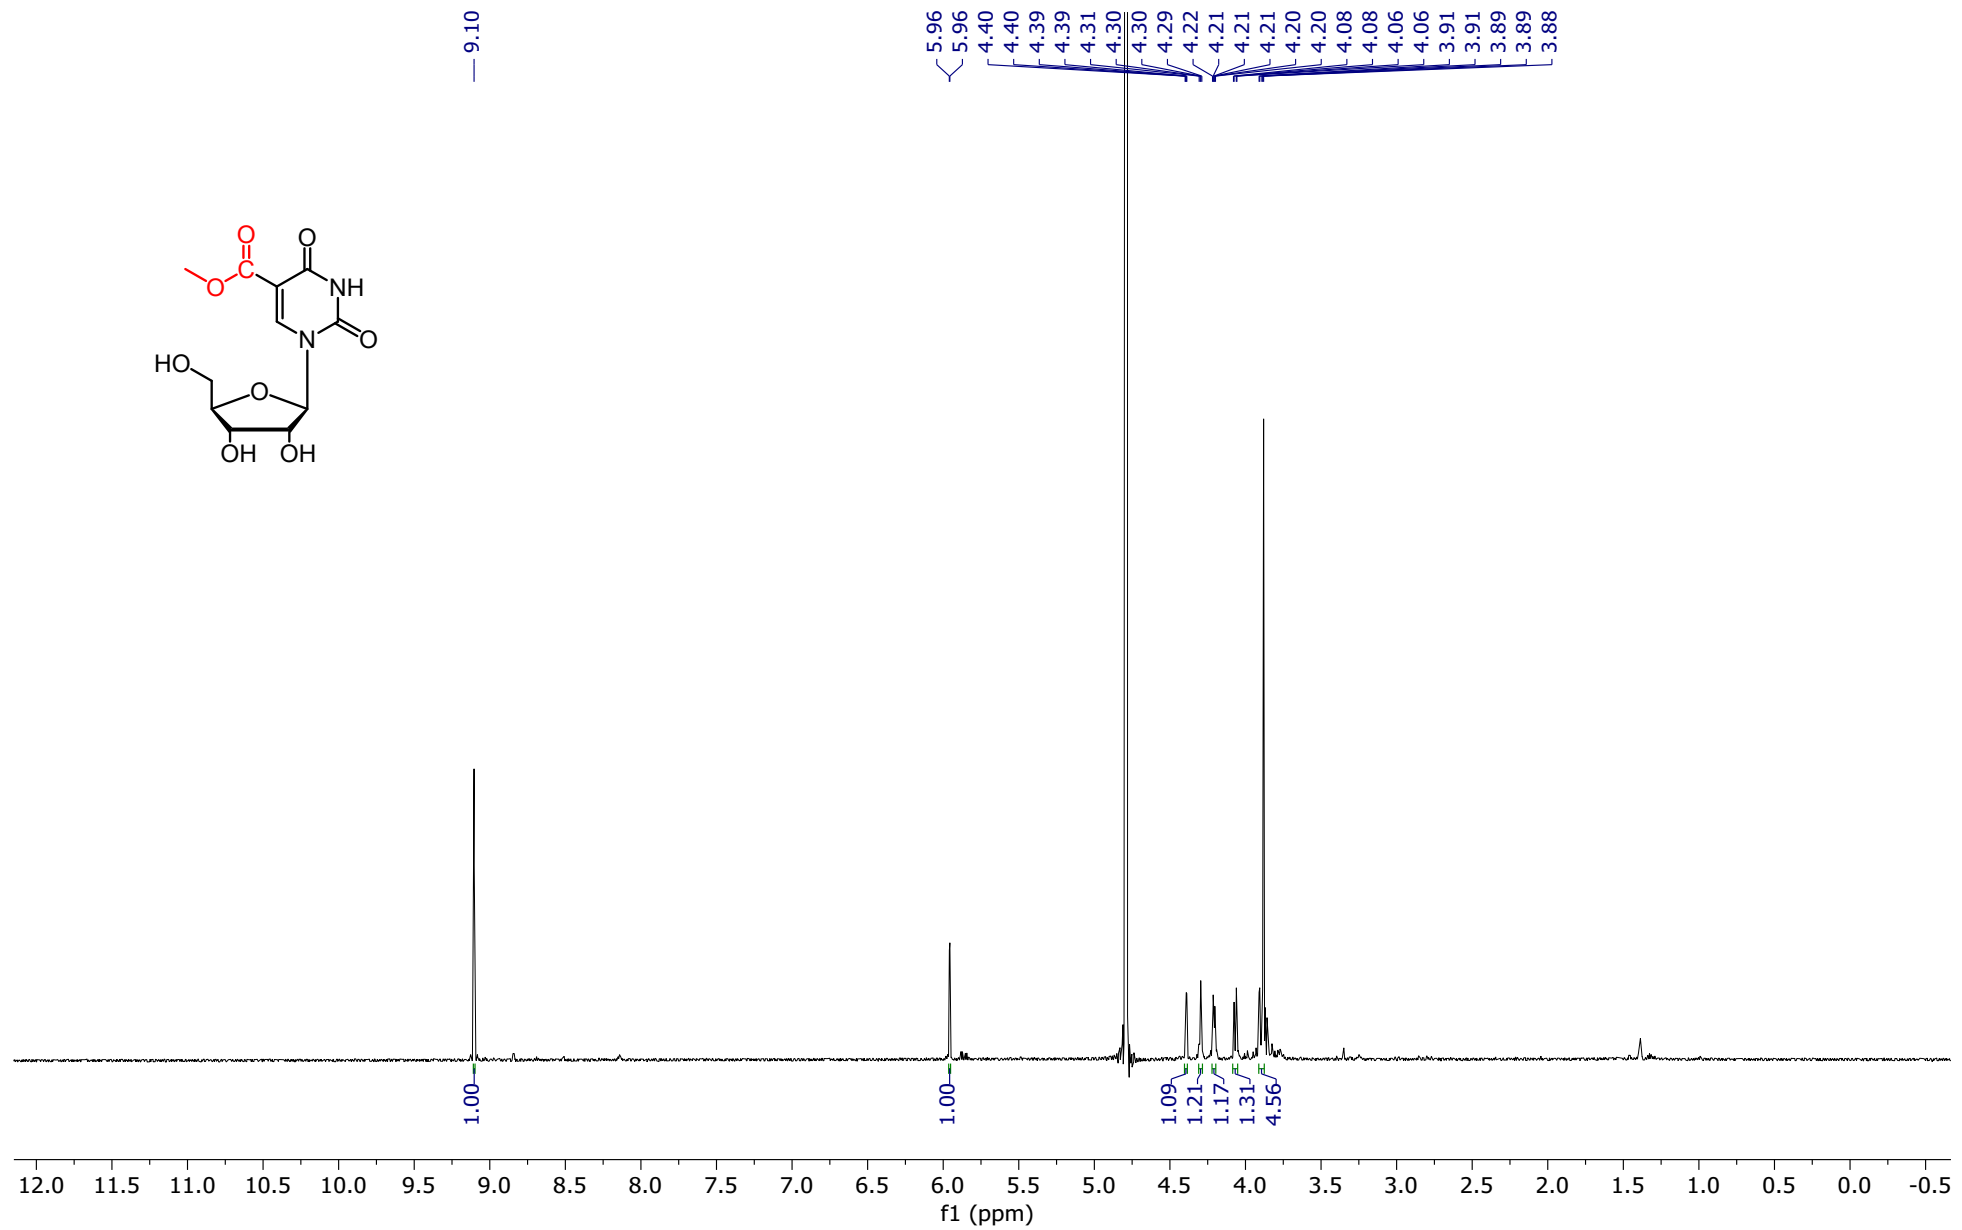

**Figure S11.** <sup>1</sup>H NMR spectrum of **4a** (700 MHz, D<sub>2</sub>O).

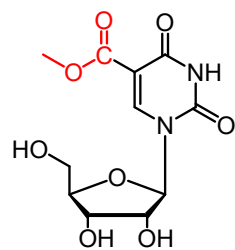

— 164.73  
— 162.15

— 150.61  
— 149.13

— 104.17

— 90.58

— 83.78

— 74.39

— 68.35

— 59.48

— 52.43

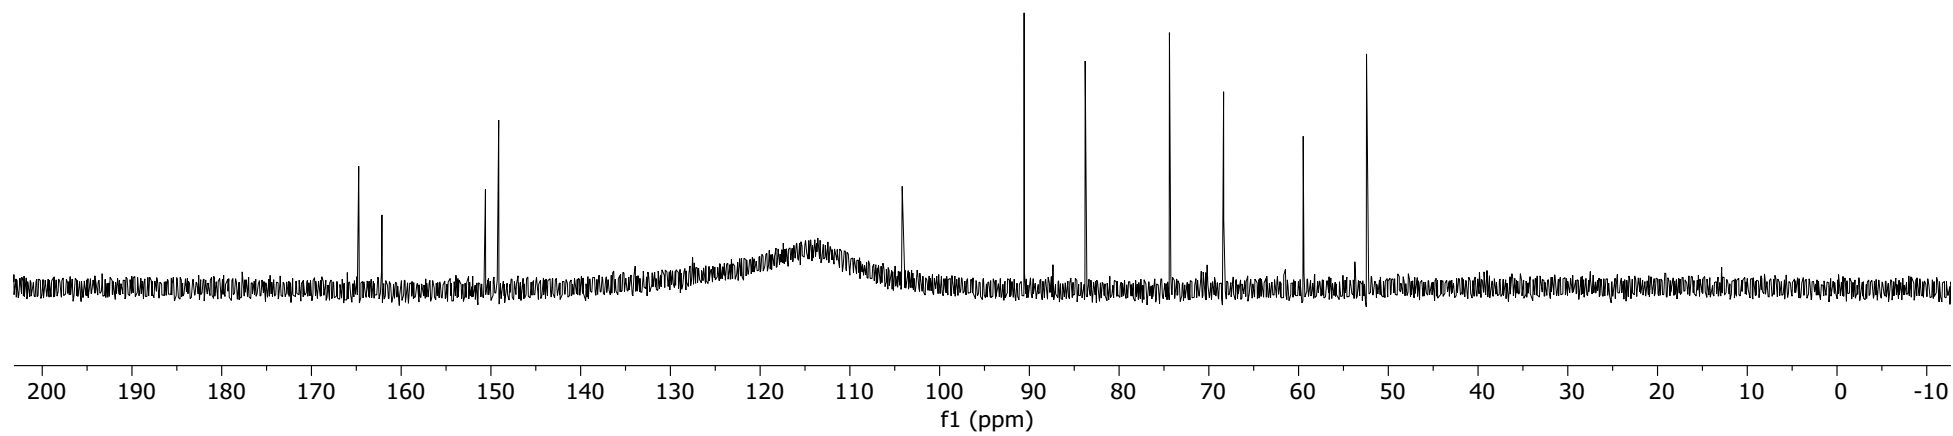

Figure S12.  $^{13}\text{C}$  NMR spectrum of **4a** (176 MHz,  $\text{D}_2\text{O}$ ).

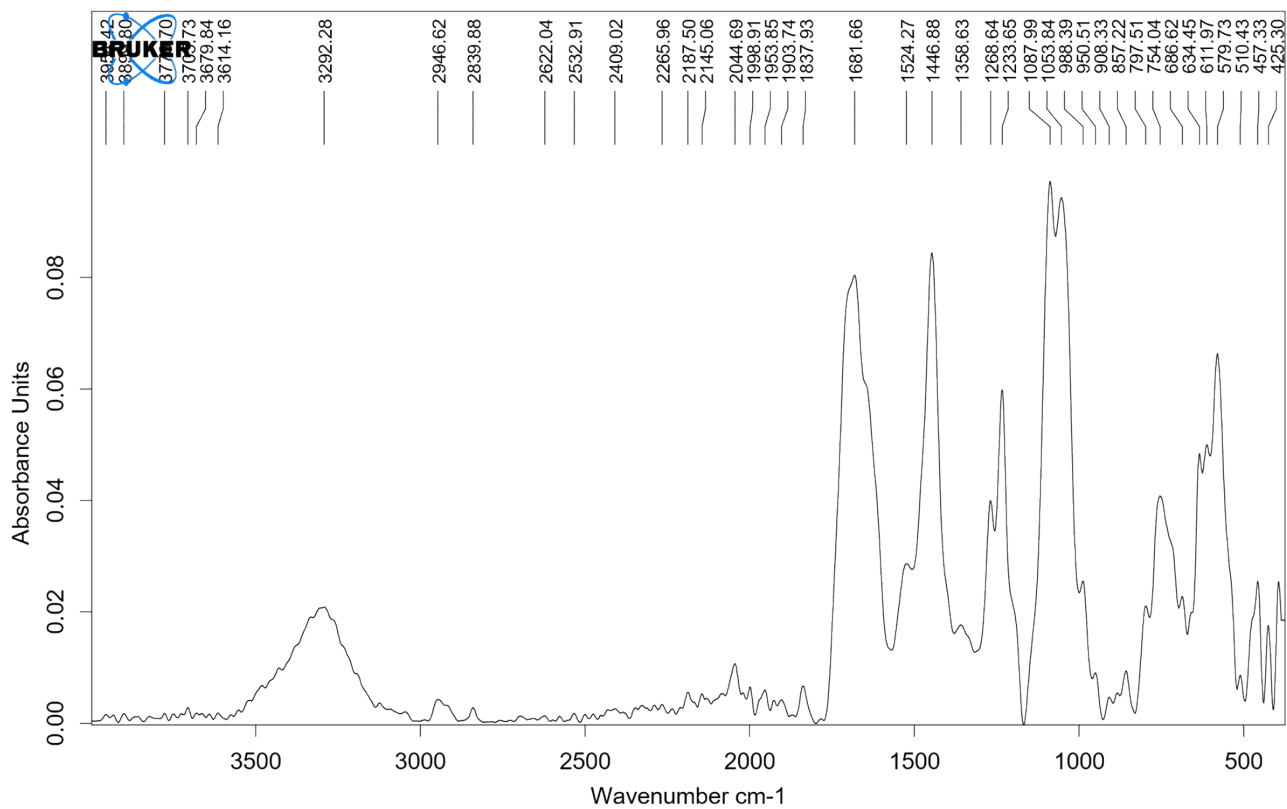

**Figure S13.** IR spectrum of 5-methoxycarbonyluridine (**4a**).

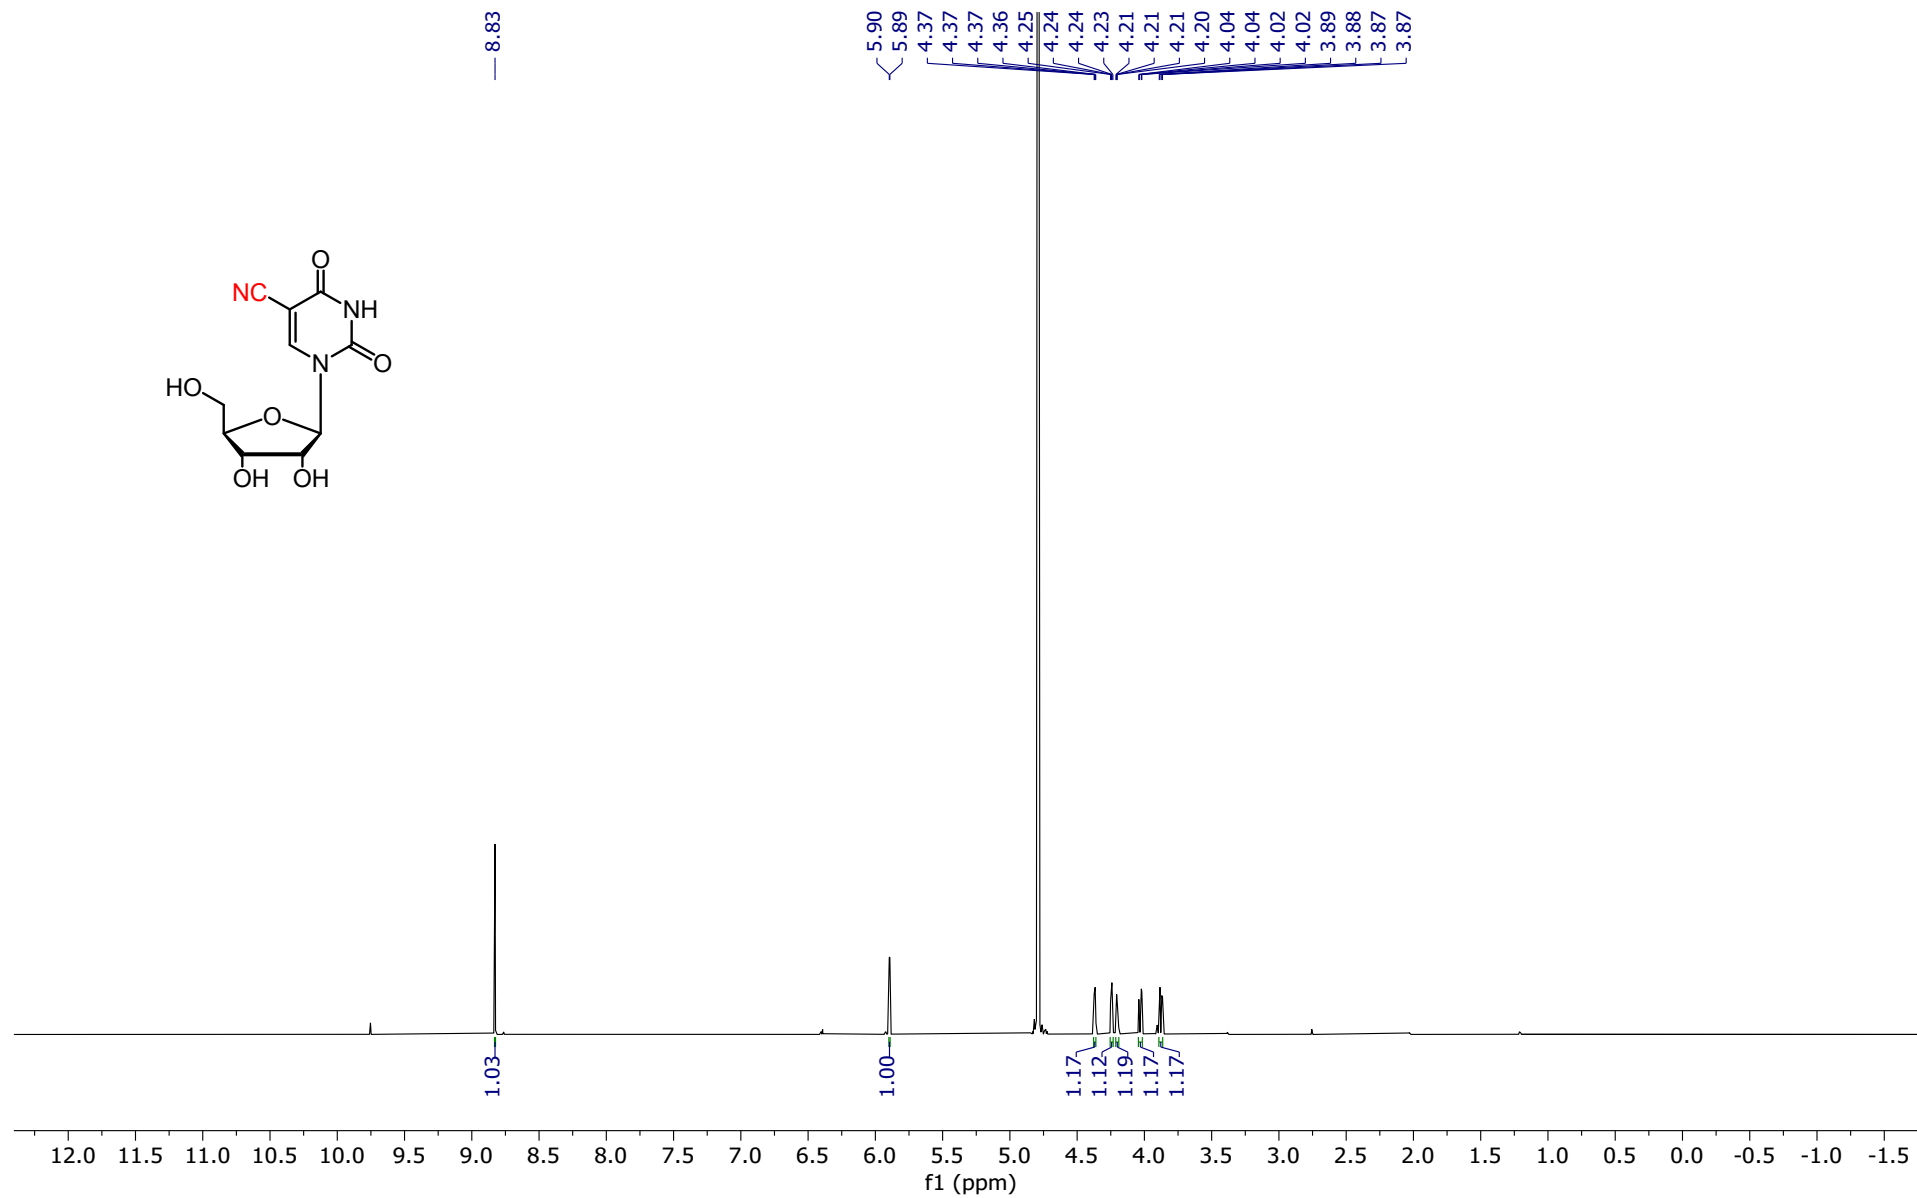

**Figure S14.** <sup>1</sup>H NMR spectrum of **5a** (700 MHz, D<sub>2</sub>O).

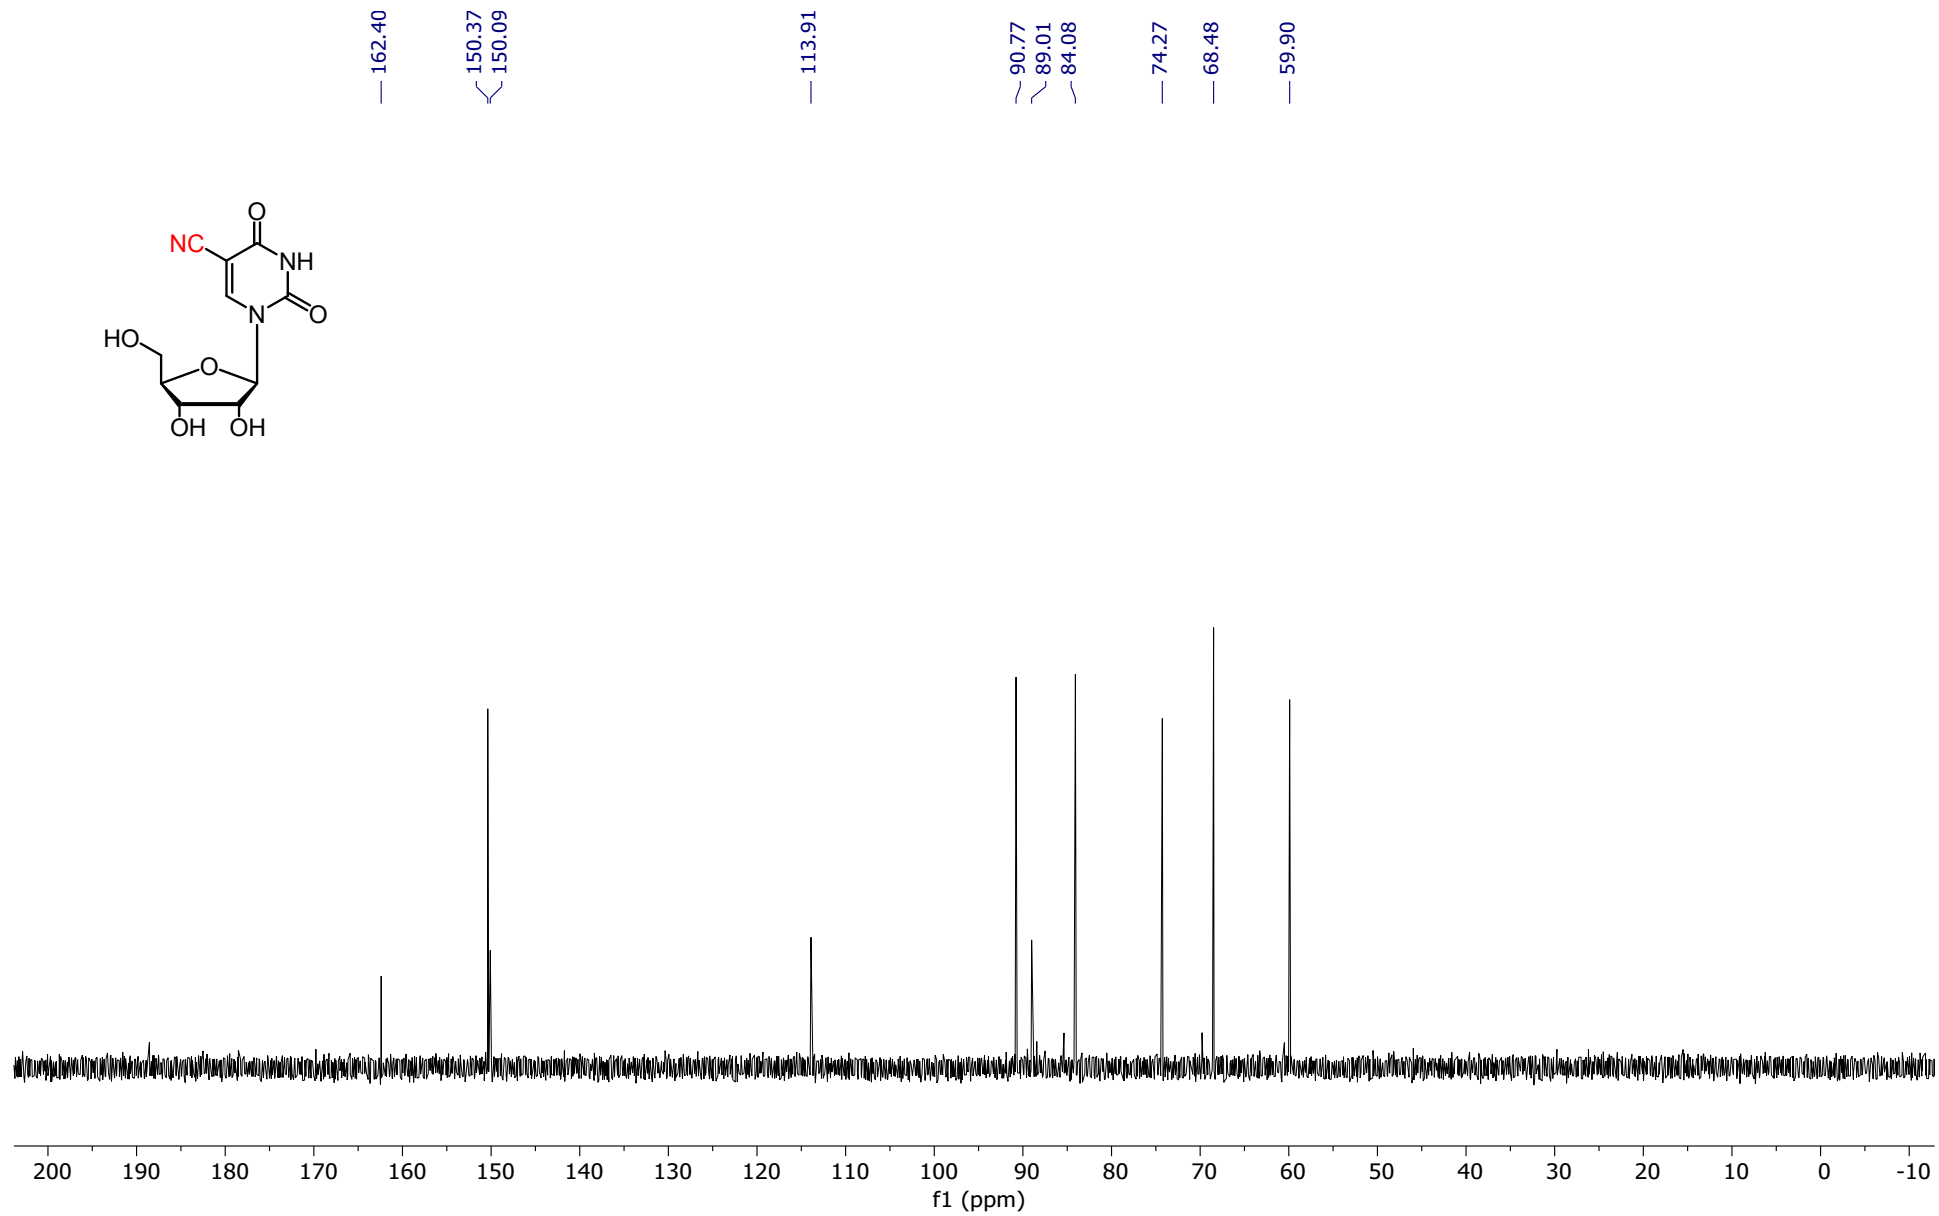

**Figure S15.** <sup>13</sup>C NMR spectrum of **5a** (176 MHz, D<sub>2</sub>O).



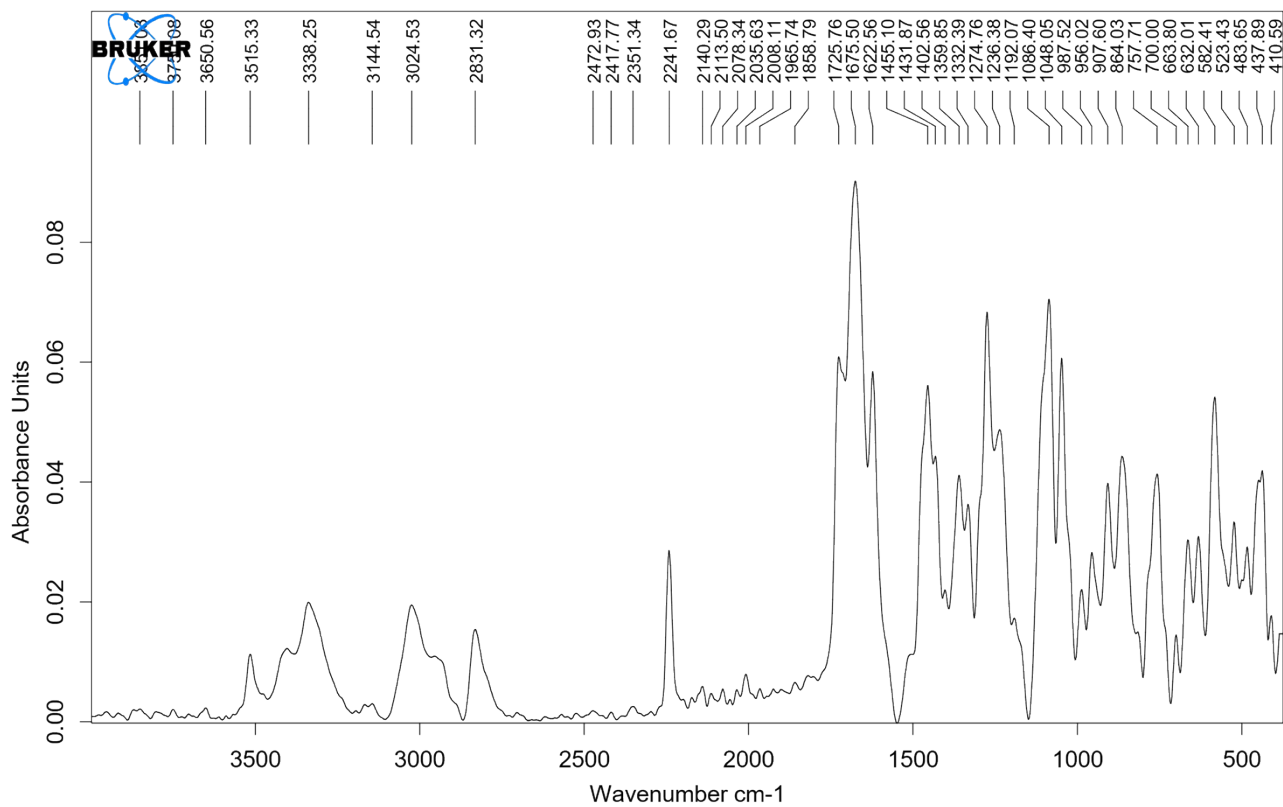

**Figure S16.** IR spectrum of 5-cyanouridine (**5a**).

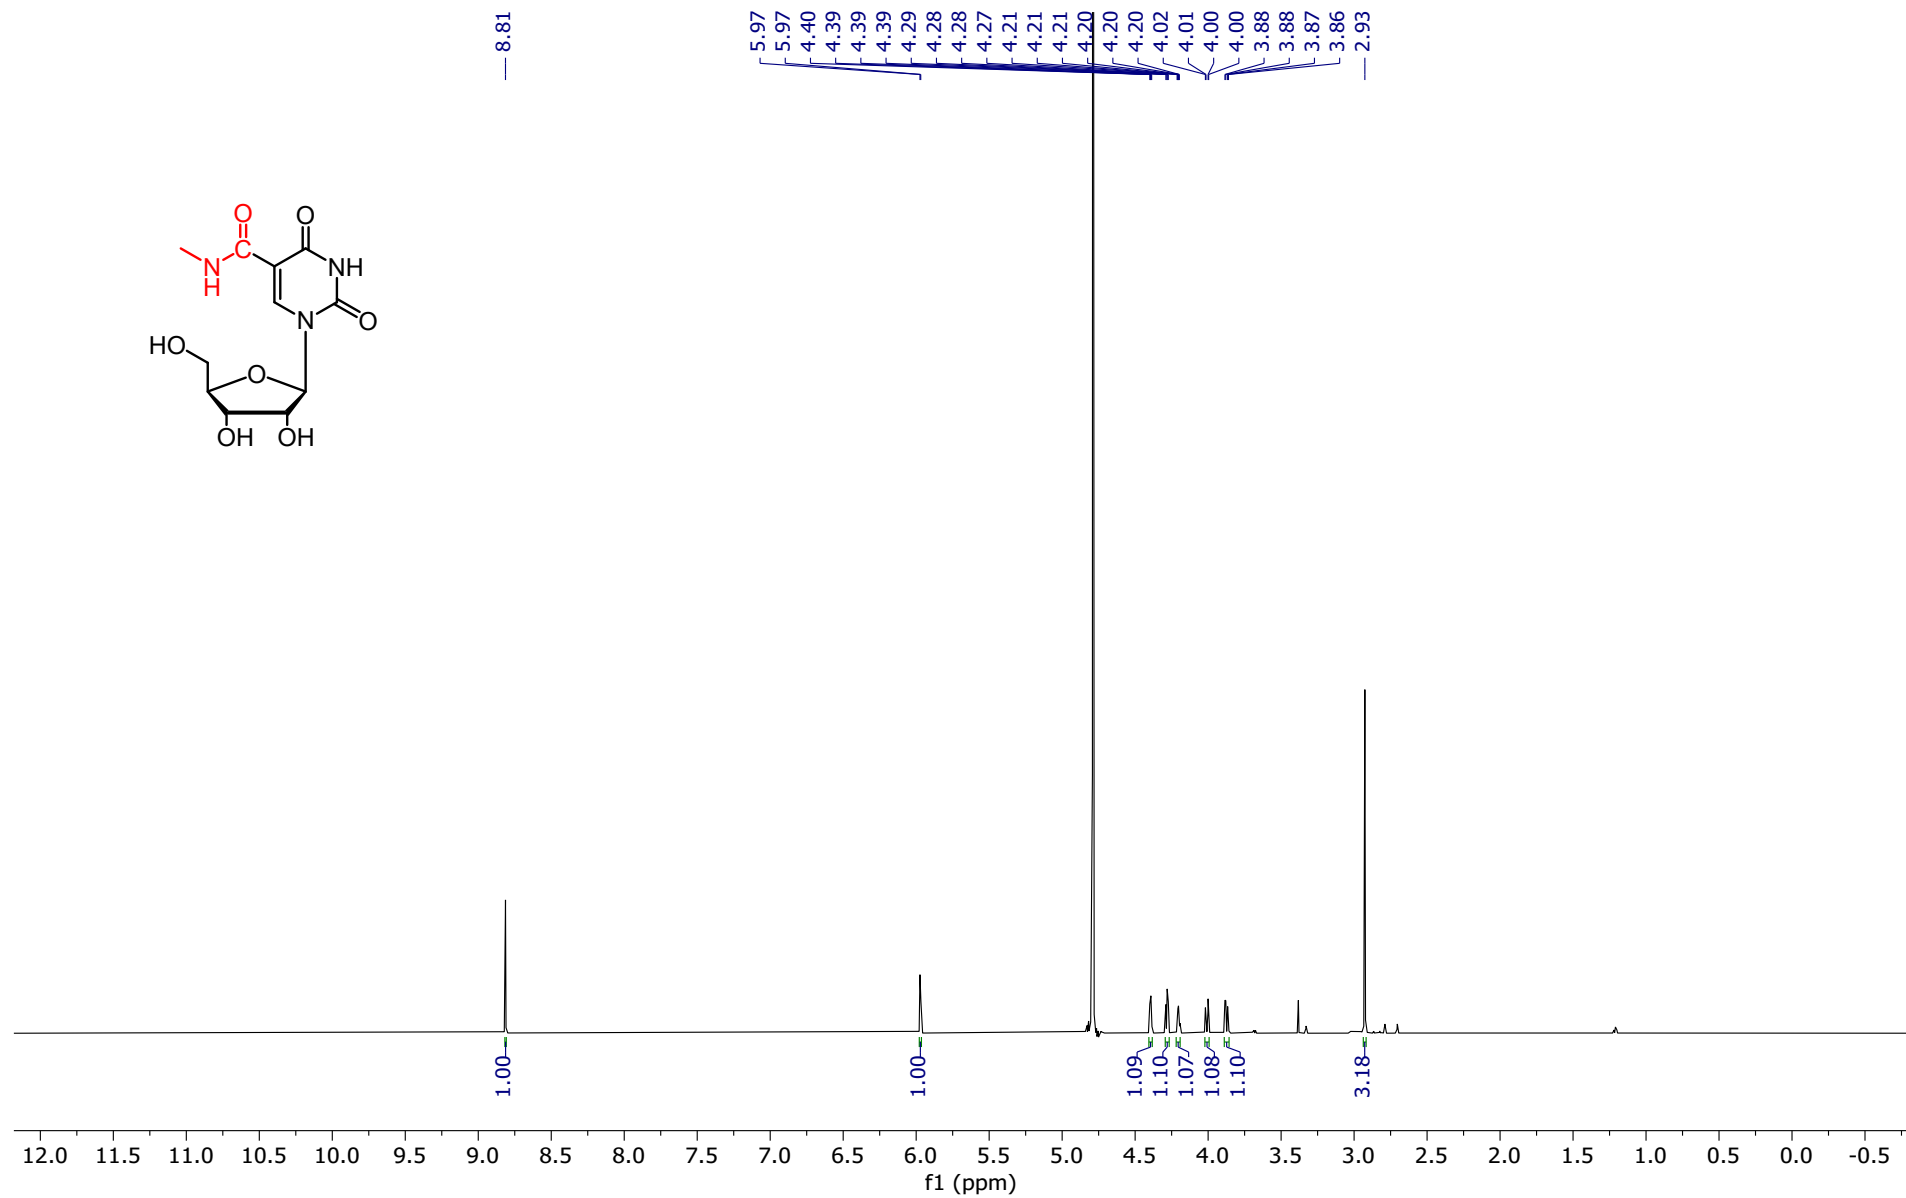

**Figure S17.** <sup>1</sup>H NMR spectrum of **6a** (700 MHz, D<sub>2</sub>O).

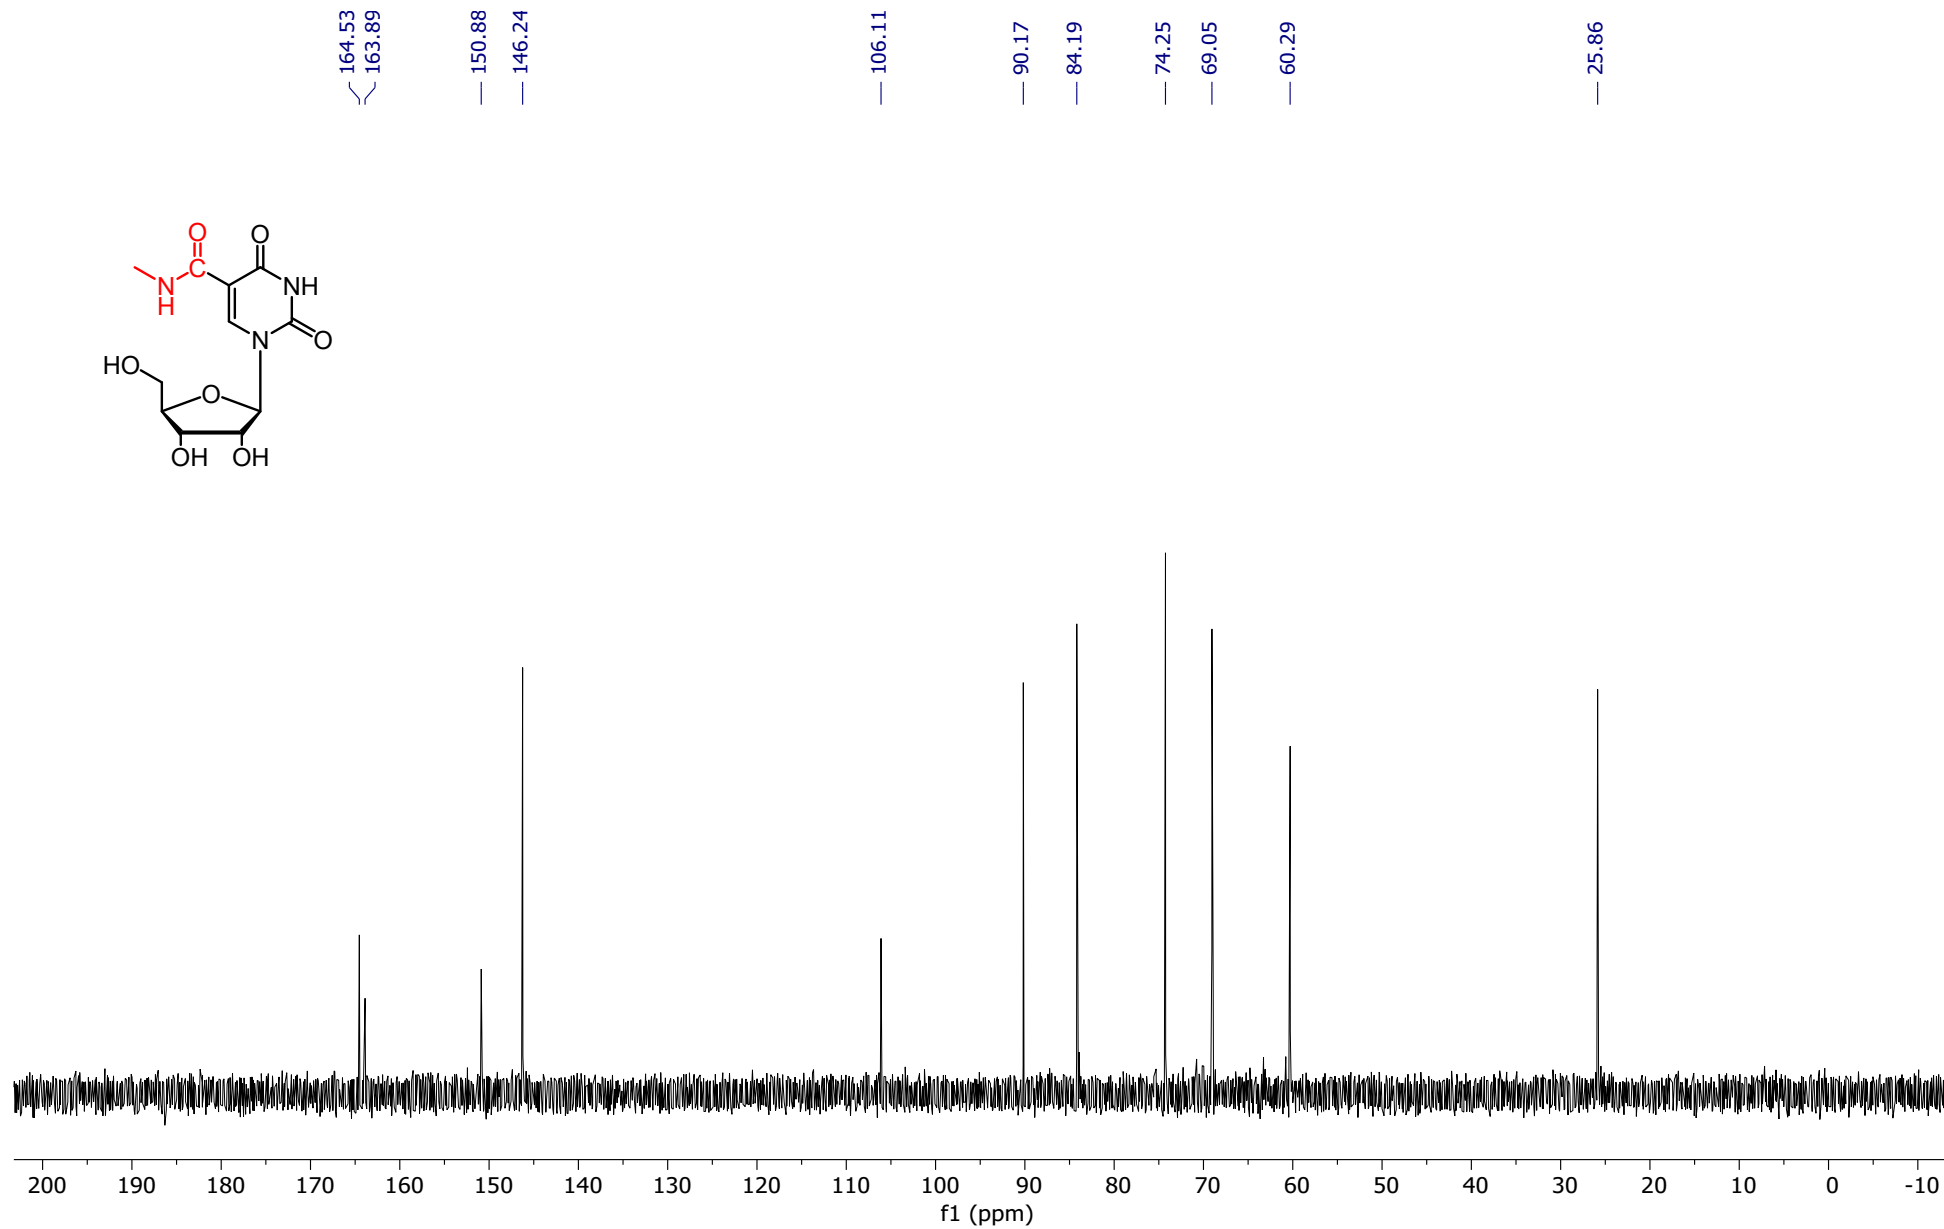

Figure S18. <sup>13</sup>C NMR spectrum of **6a** (176 MHz, D<sub>2</sub>O).

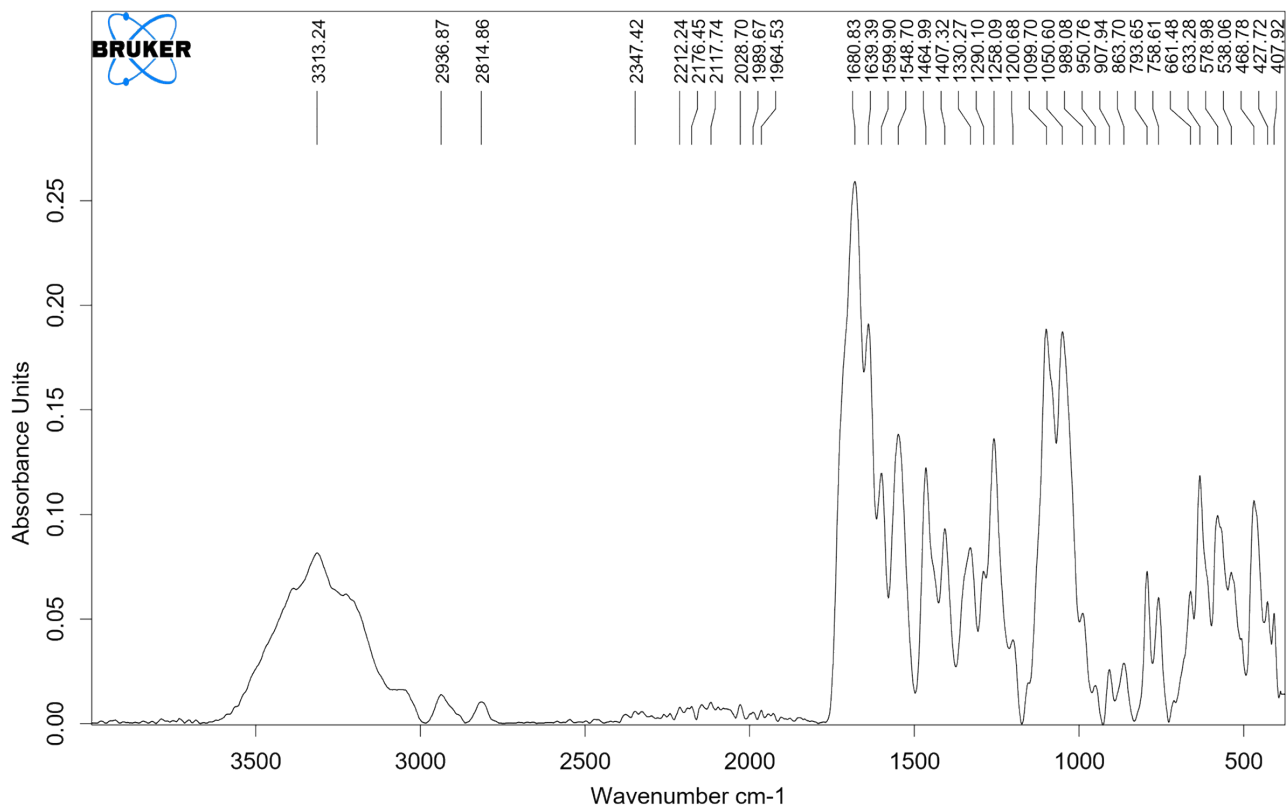

**Figure S19.** IR spectrum of 5-*N*-methylcarbamoyluridine (**6a**).

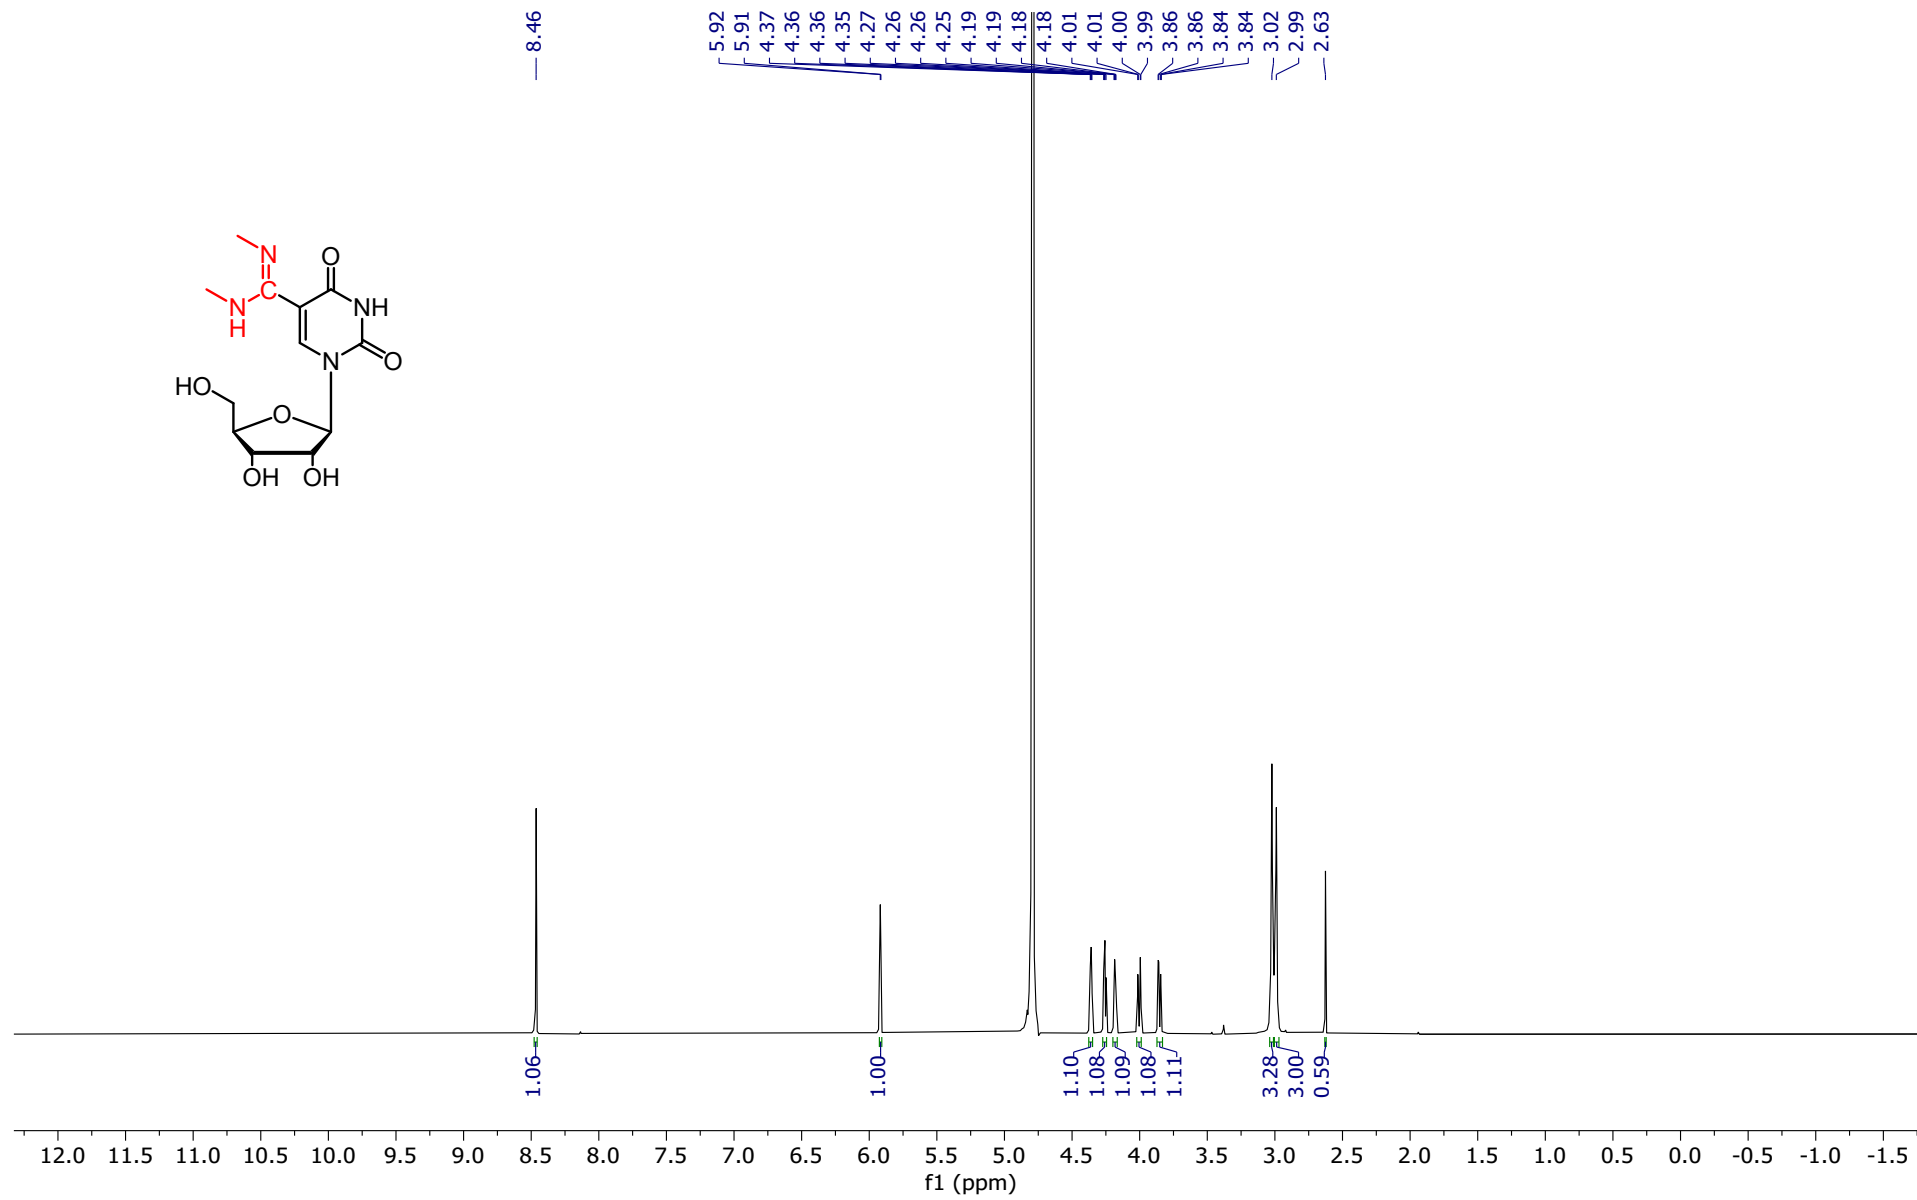

**Figure S20.** <sup>1</sup>H NMR spectrum of **7a** (700 MHz, D<sub>2</sub>O).

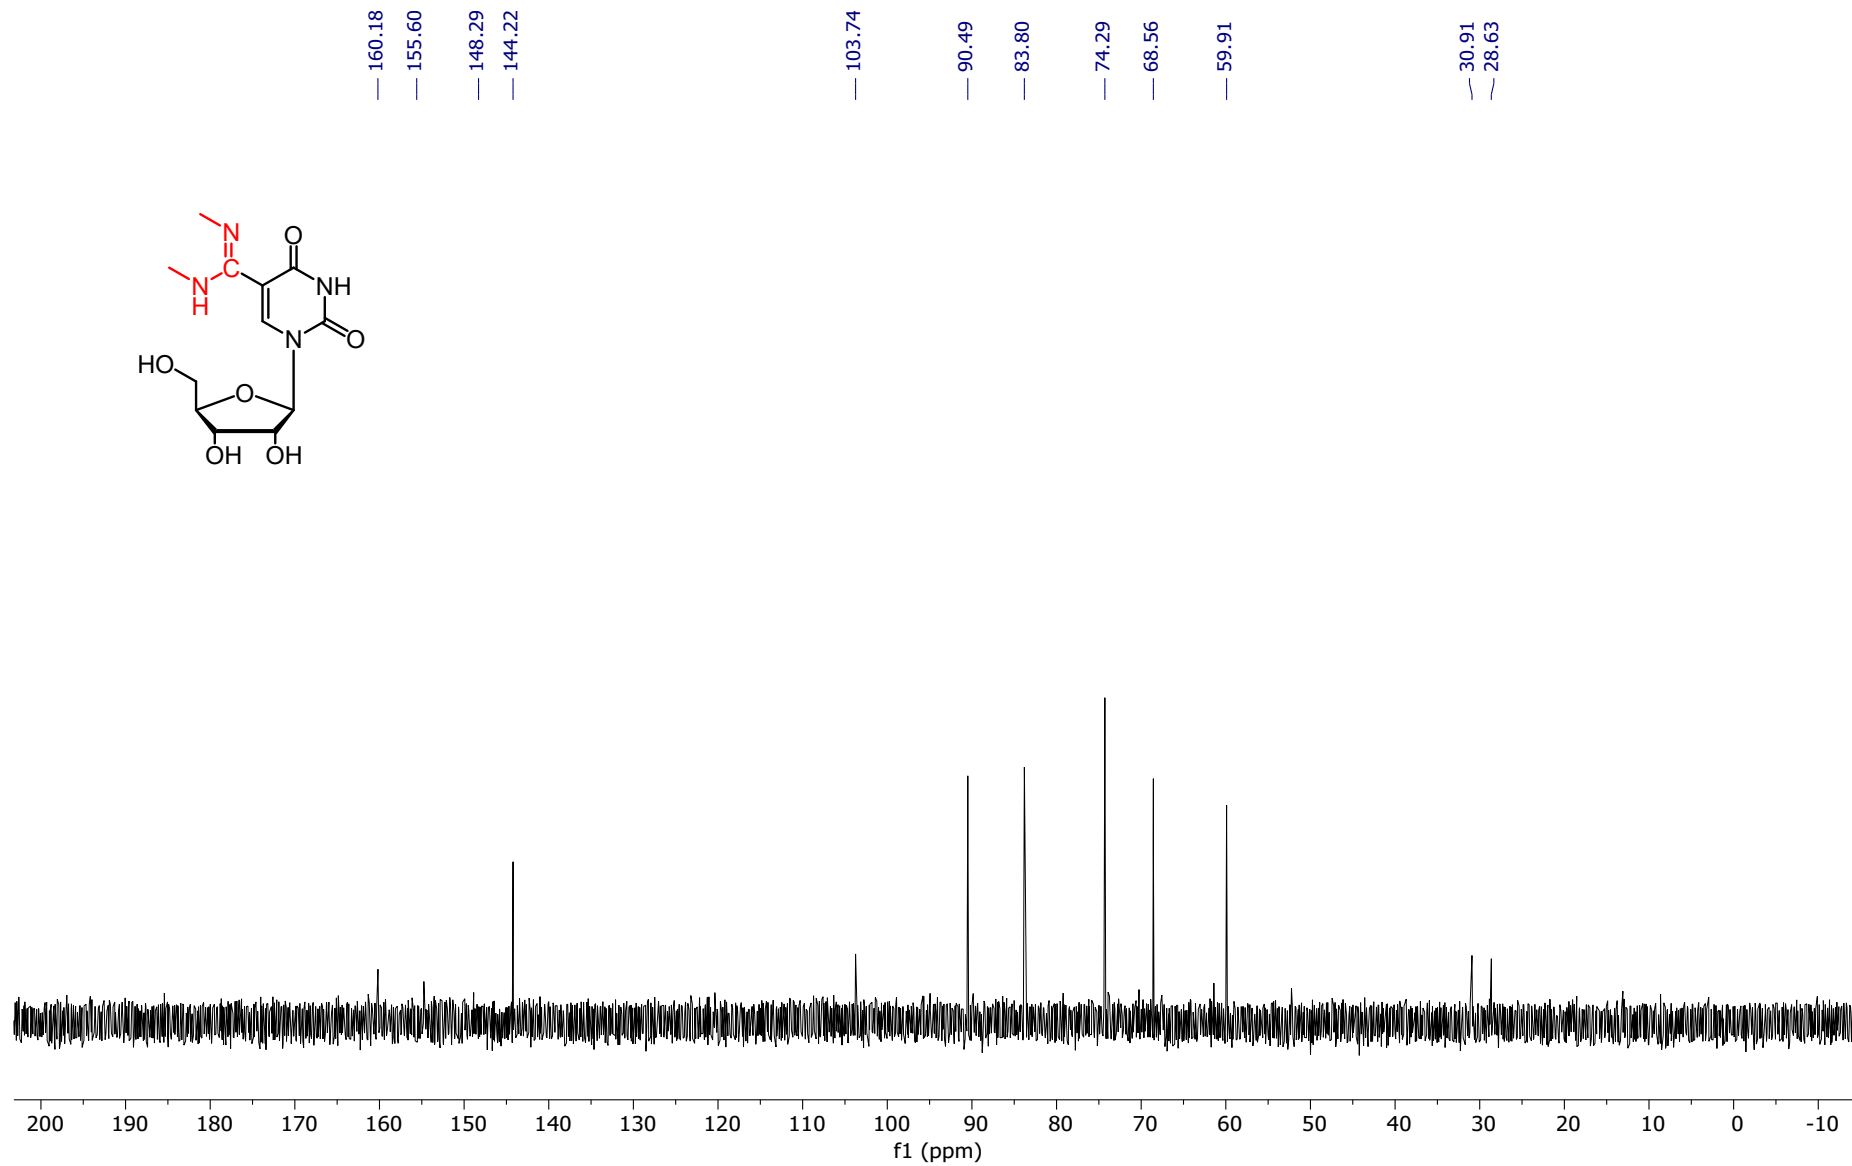

**Figure S21.** <sup>13</sup>C NMR spectrum of **7a** (176 MHz, D<sub>2</sub>O).

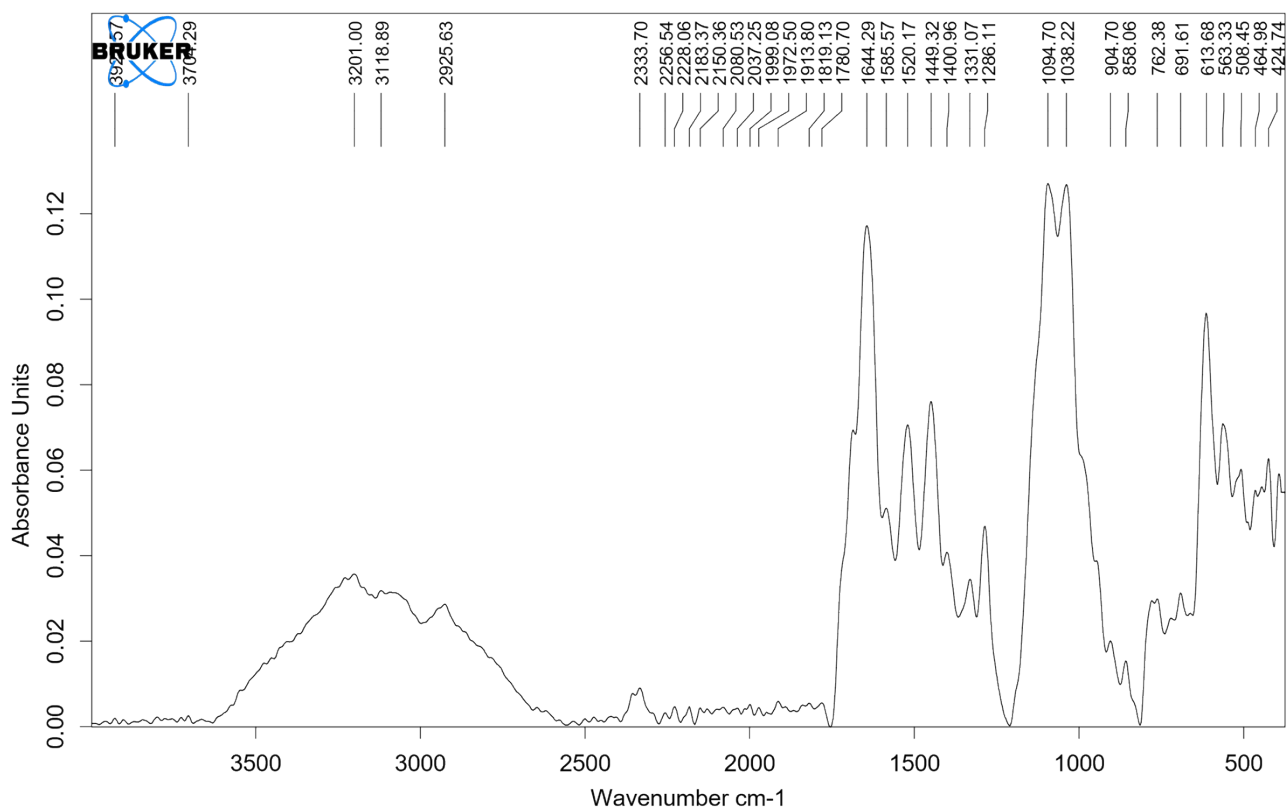

**Figure S22.** IR spectrum of 5-(*N,N'*-dimethylamidinyl)uridine (**7a**).

### 1.3. IR and NMR spectra of cytidine derivatives 3b-6b

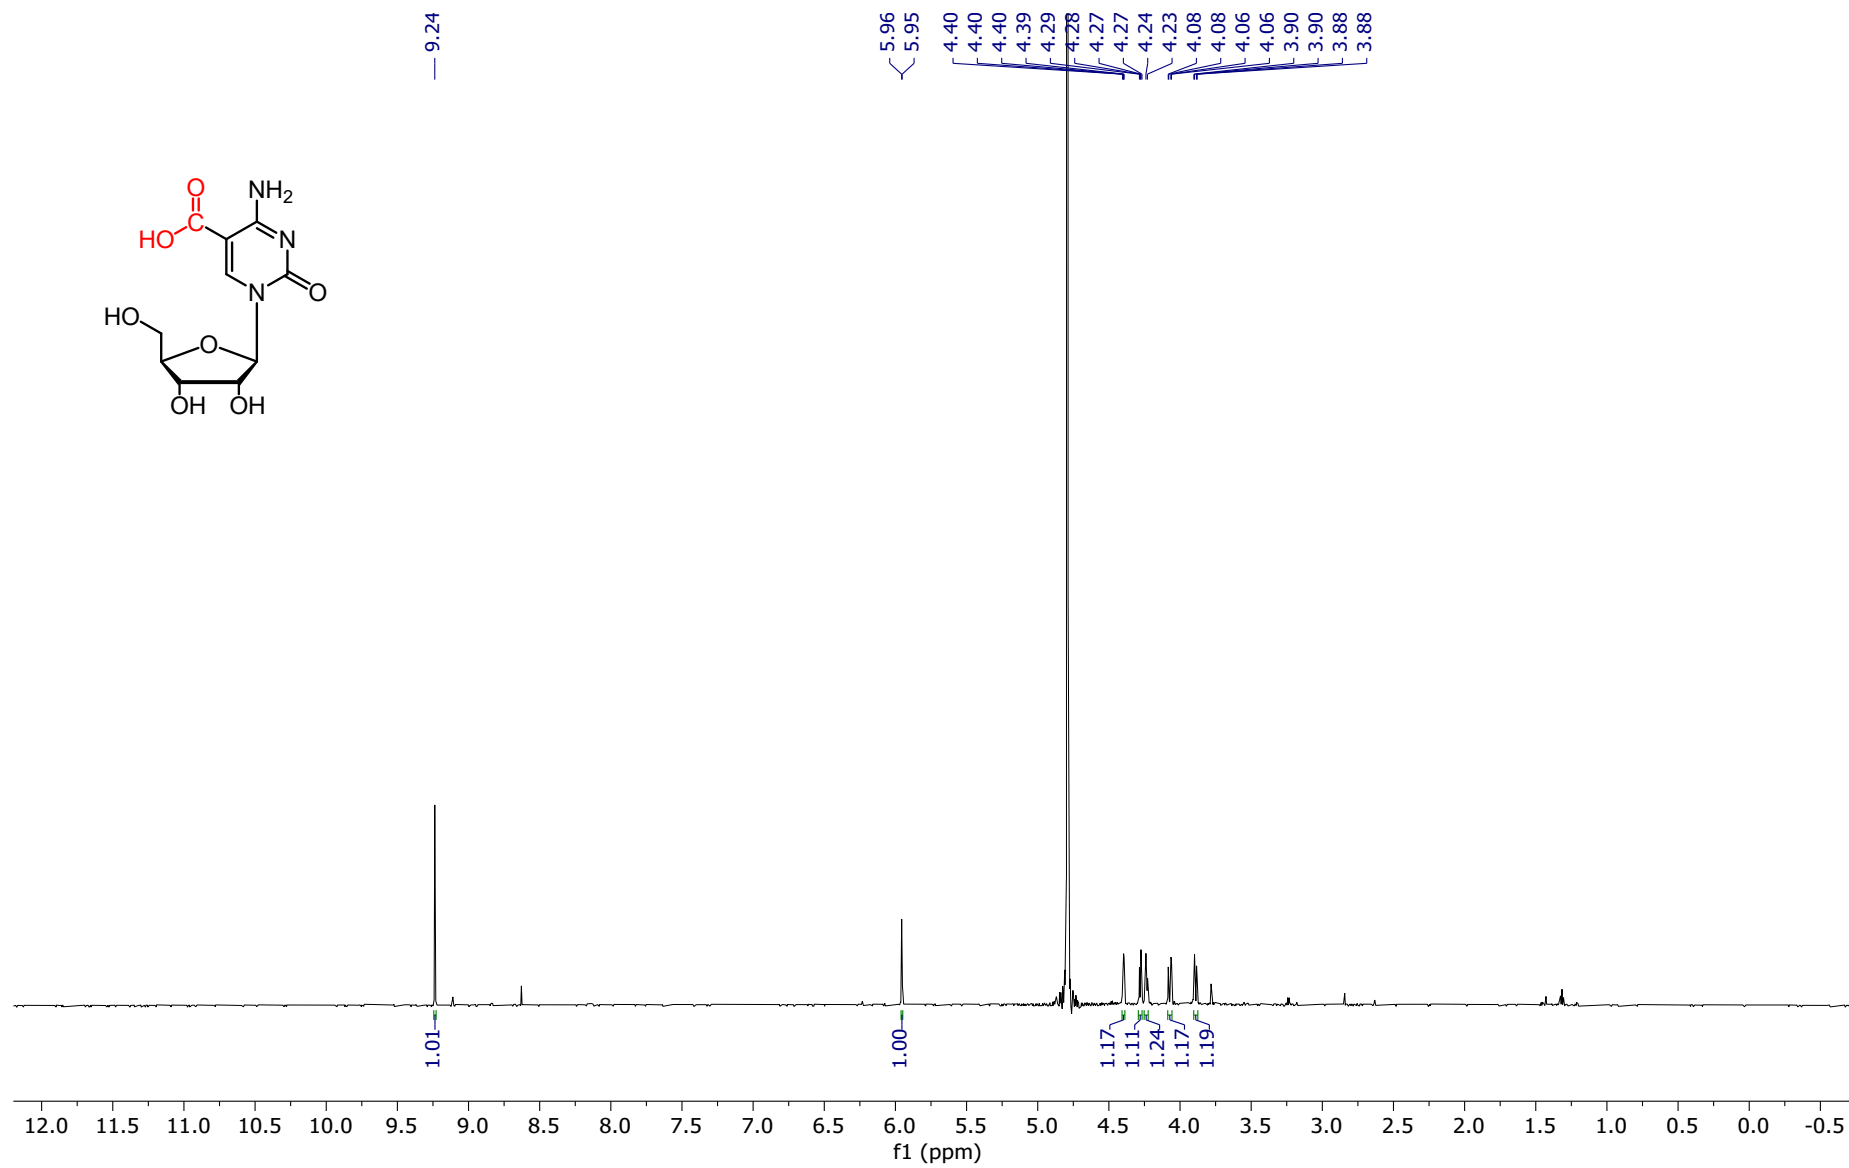

**Figure S23.** <sup>1</sup>H NMR spectrum of **3b** (700 MHz, D<sub>2</sub>O).



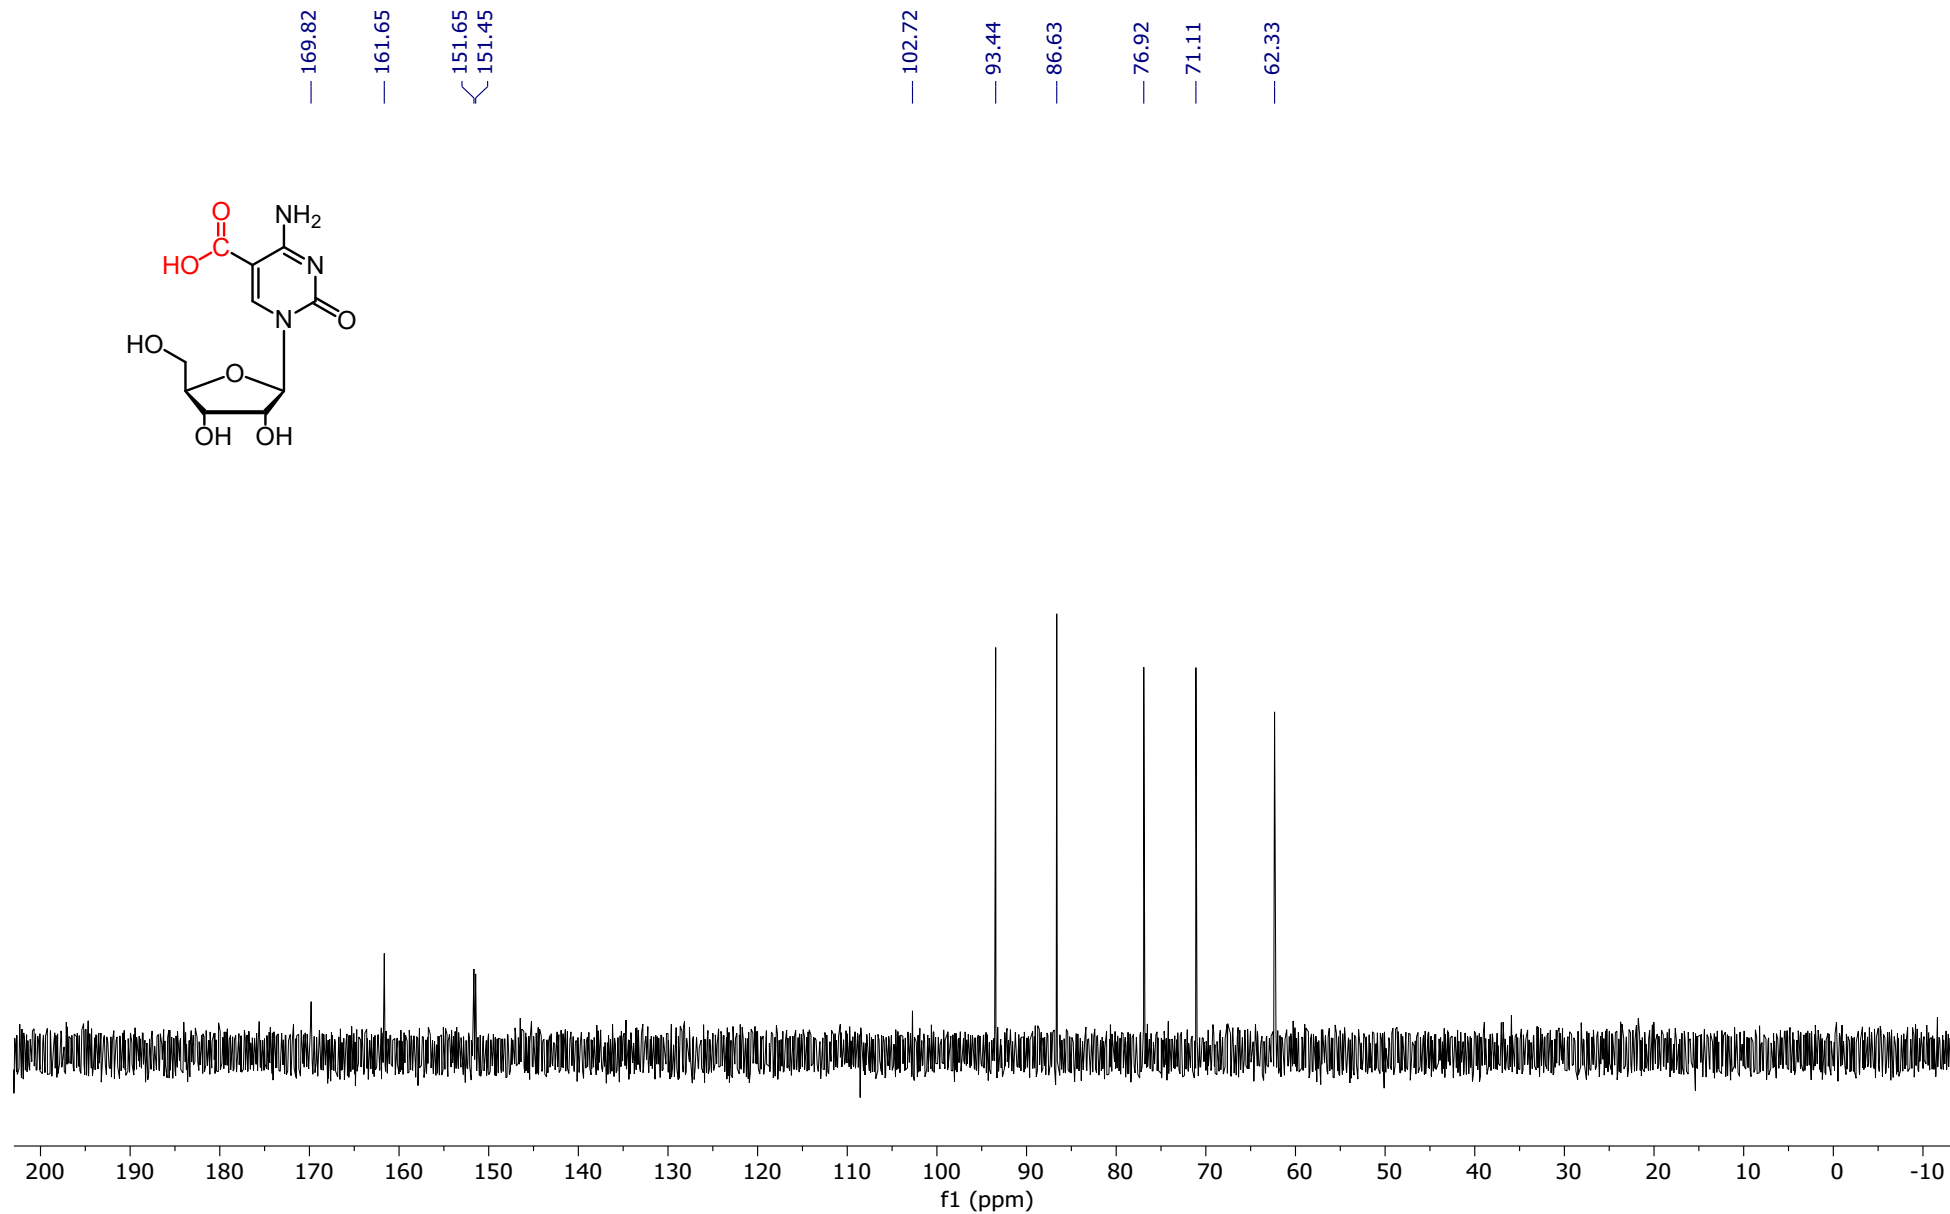

**Figure S24.**  $^{13}\text{C}$  NMR spectrum of **3b** (176 MHz,  $\text{D}_2\text{O}$ ).

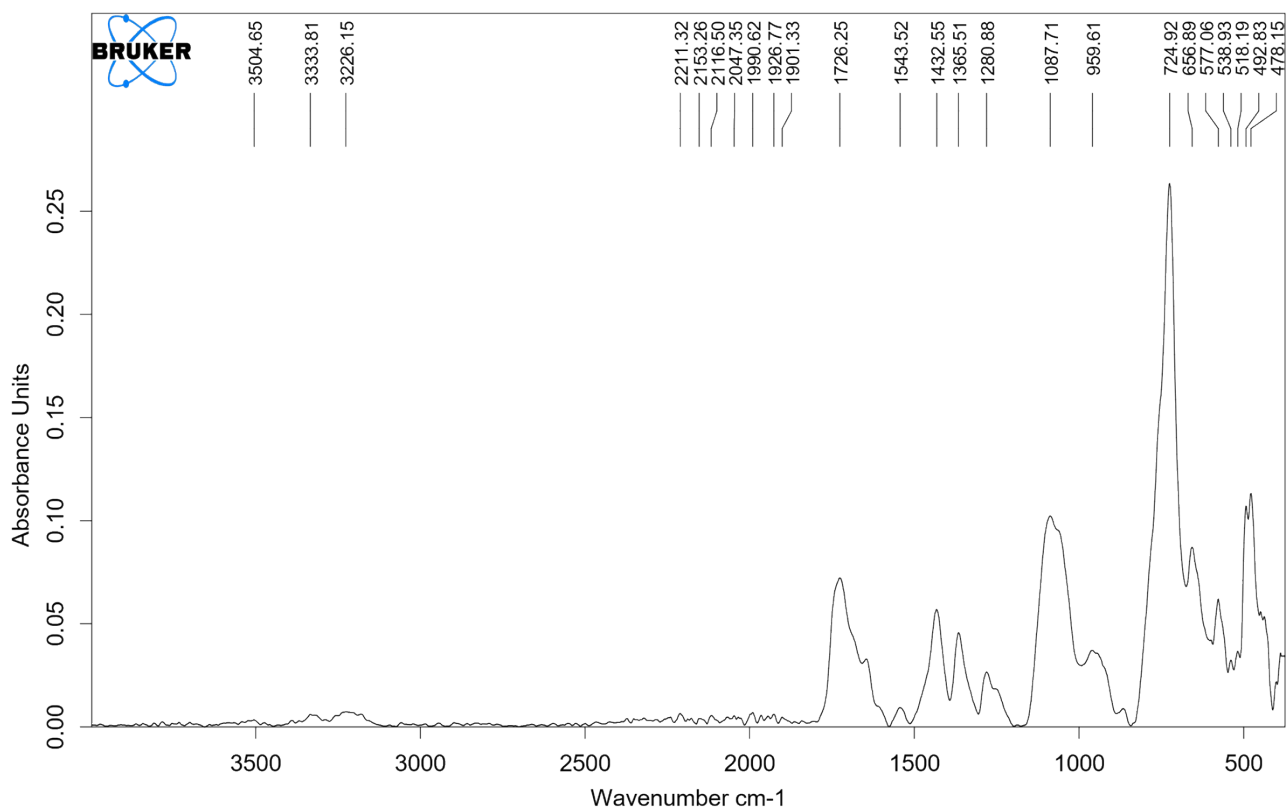

Figure S25. IR spectrum of 5-carboxycytidine (**3b**).

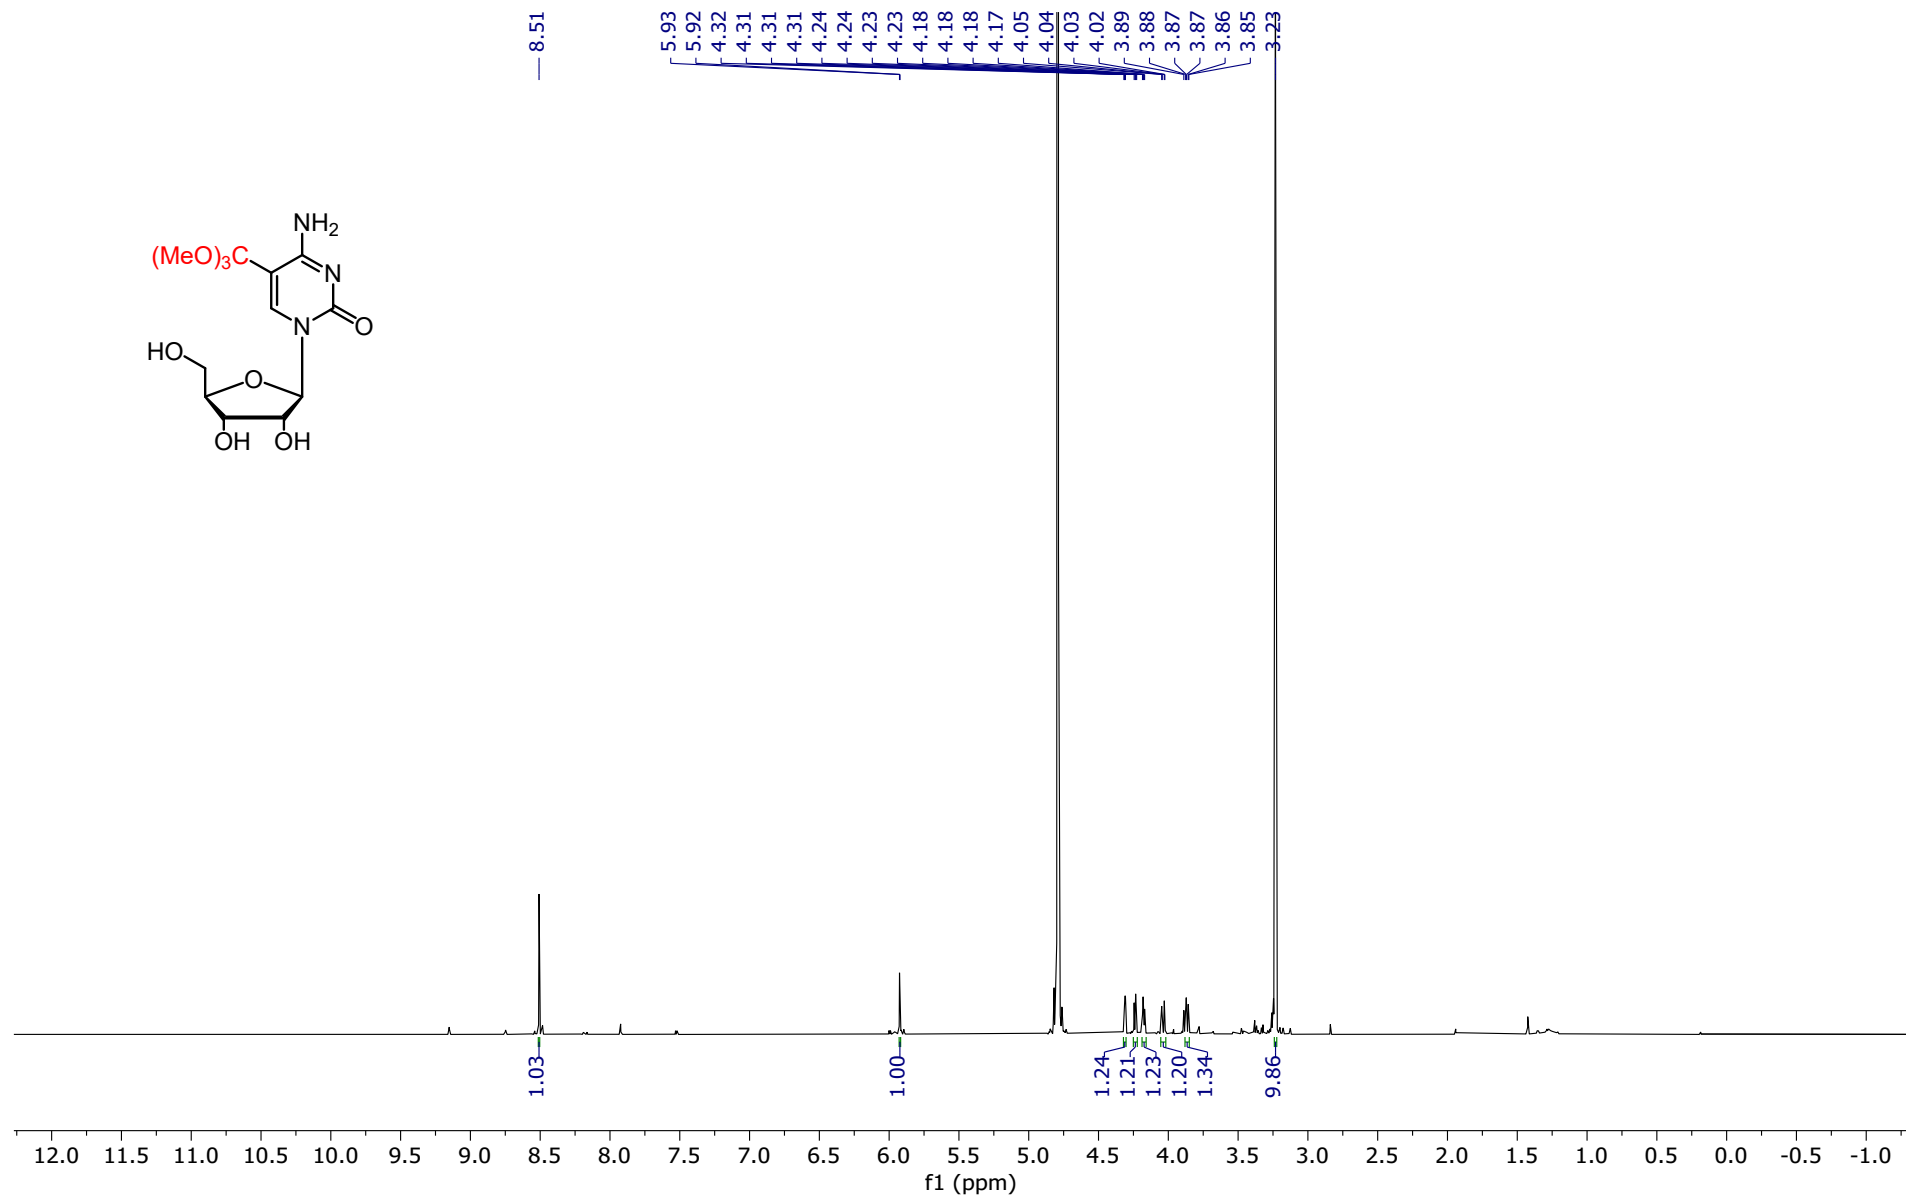

Figure S26. <sup>1</sup>H NMR spectrum of 5-(trimethoxymethyl)cytidine (700 MHz, D<sub>2</sub>O).

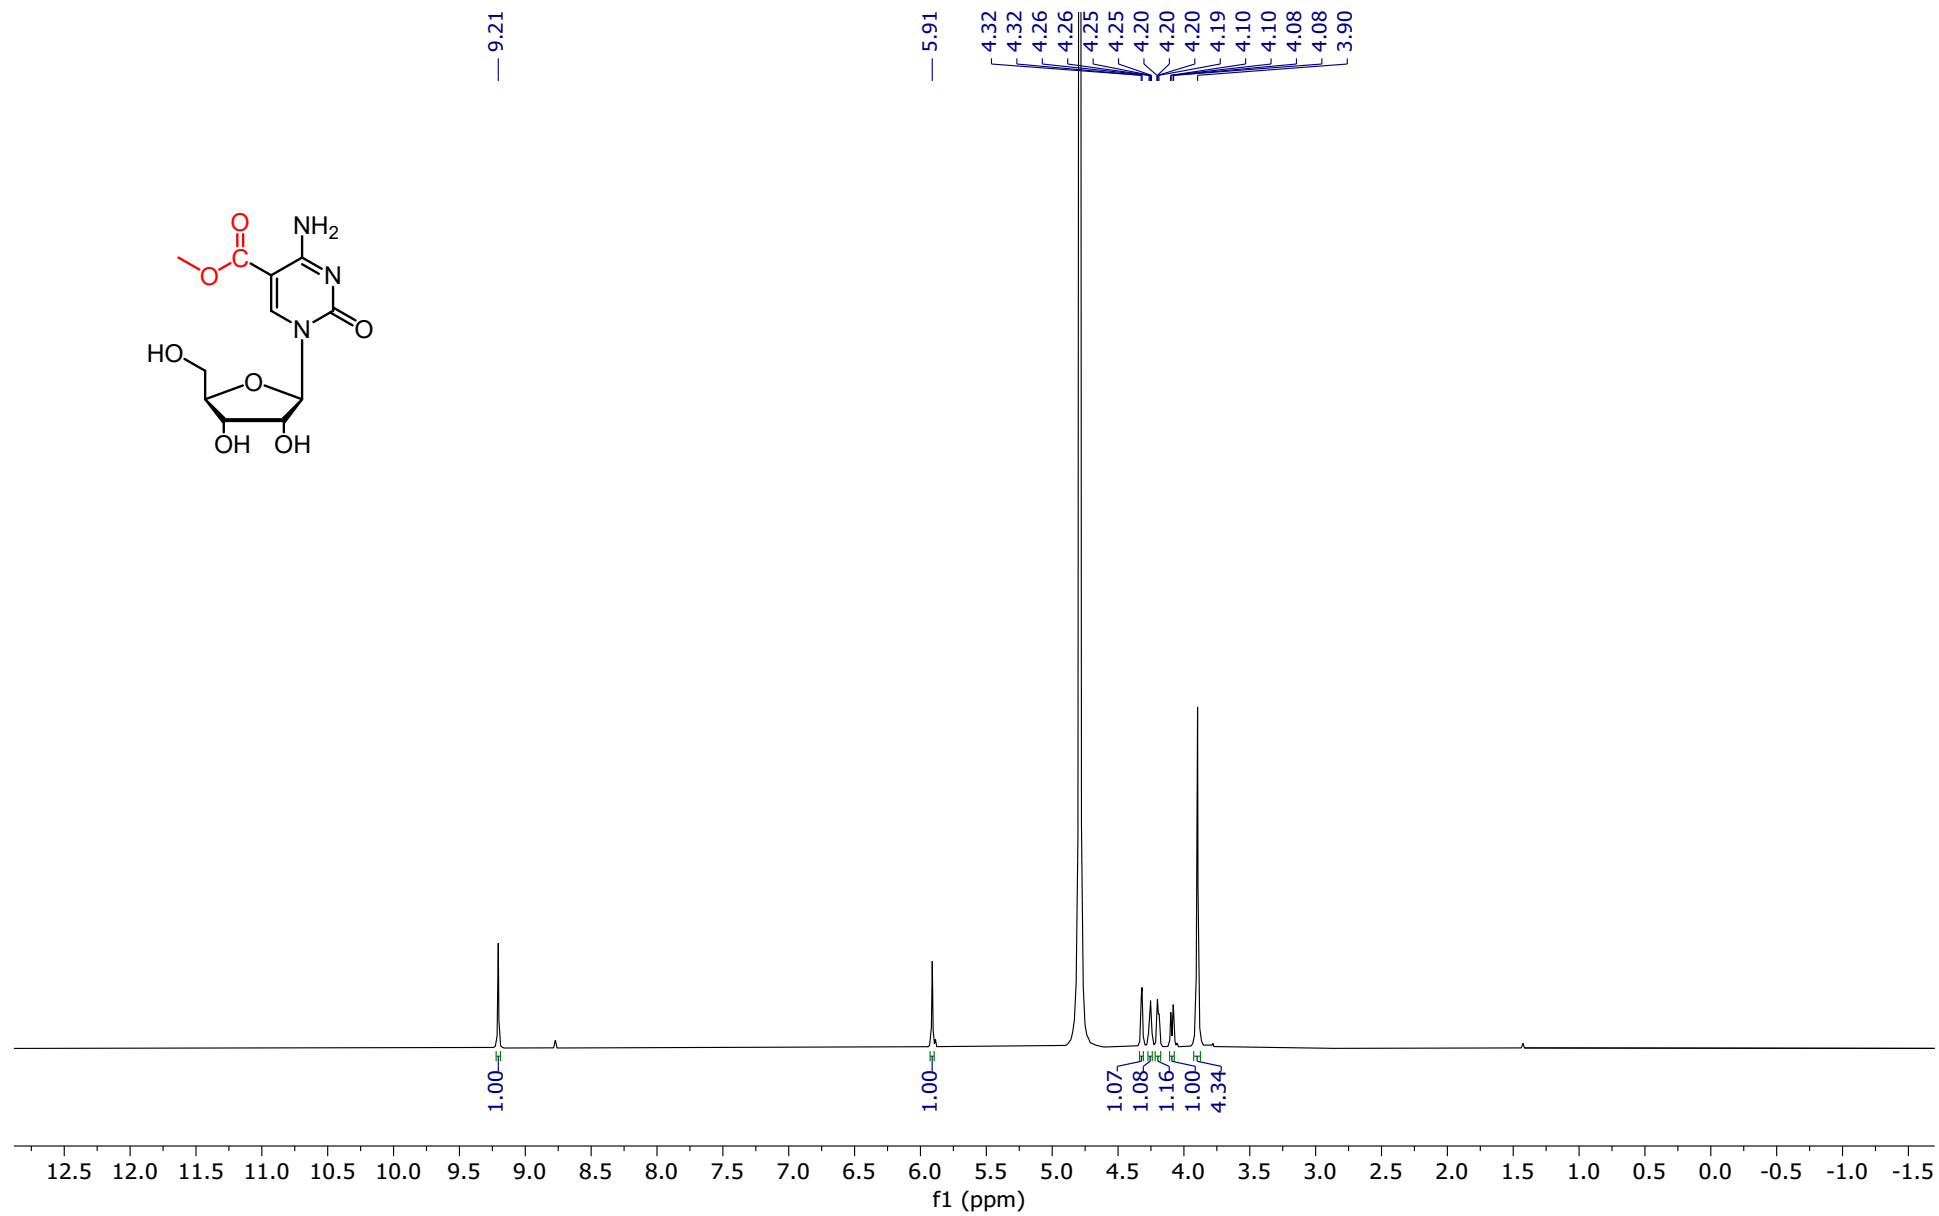

Figure S27. <sup>1</sup>H NMR spectrum of **4b** (700 MHz, D<sub>2</sub>O).

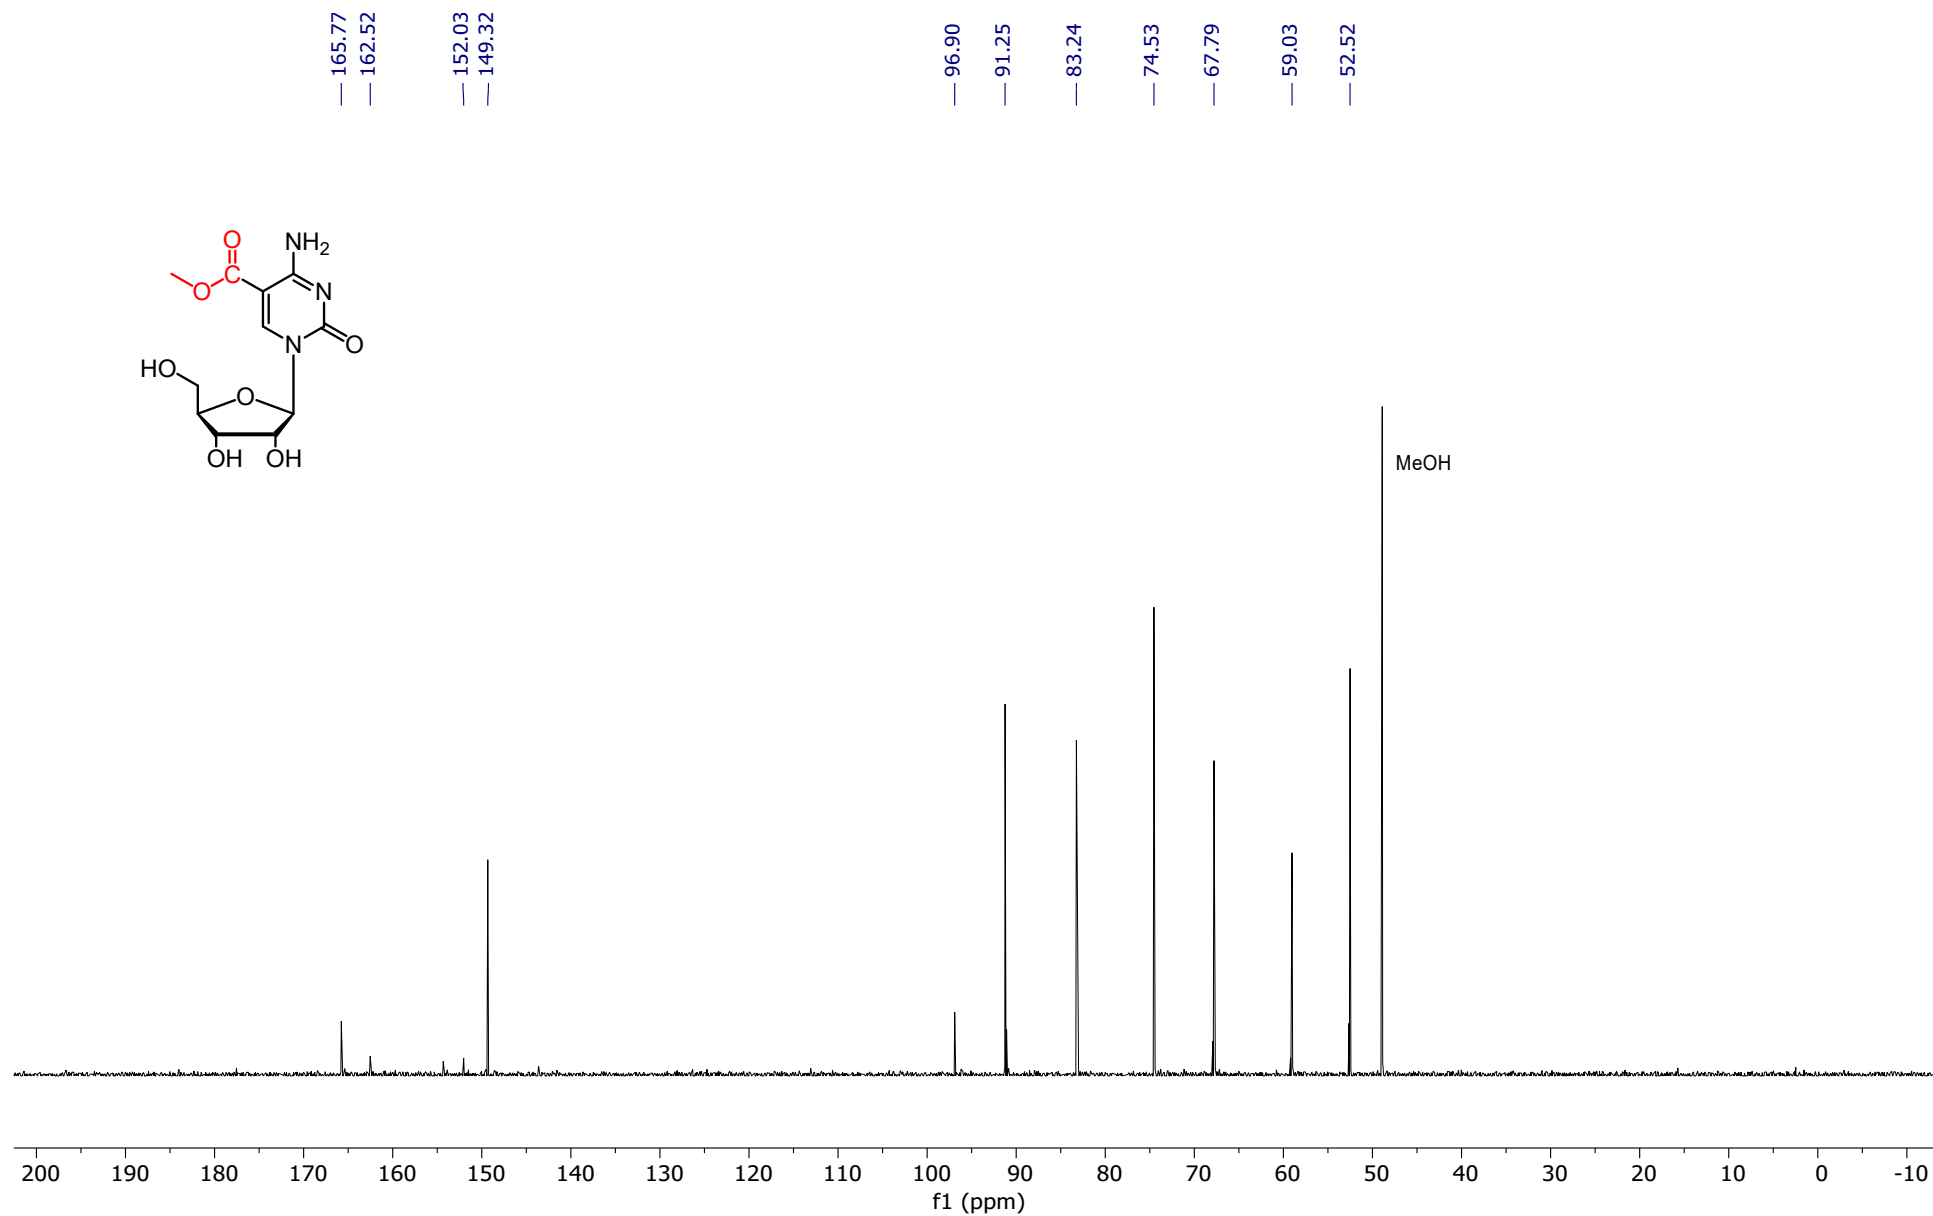

**Figure S28.** <sup>13</sup>C NMR spectrum of **4b** (176 MHz, D<sub>2</sub>O).

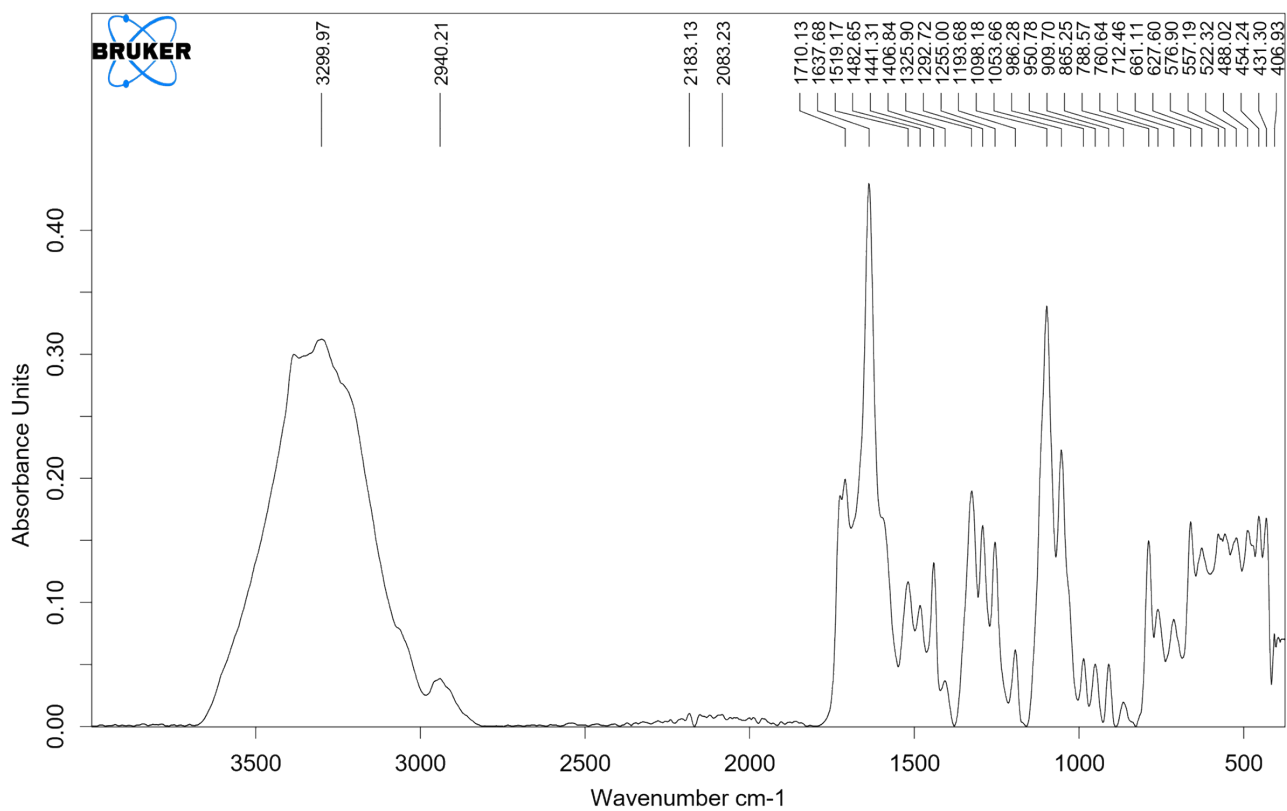

Figure S29. IR spectrum of 5-methoxycarbonylcytidine (**4b**).

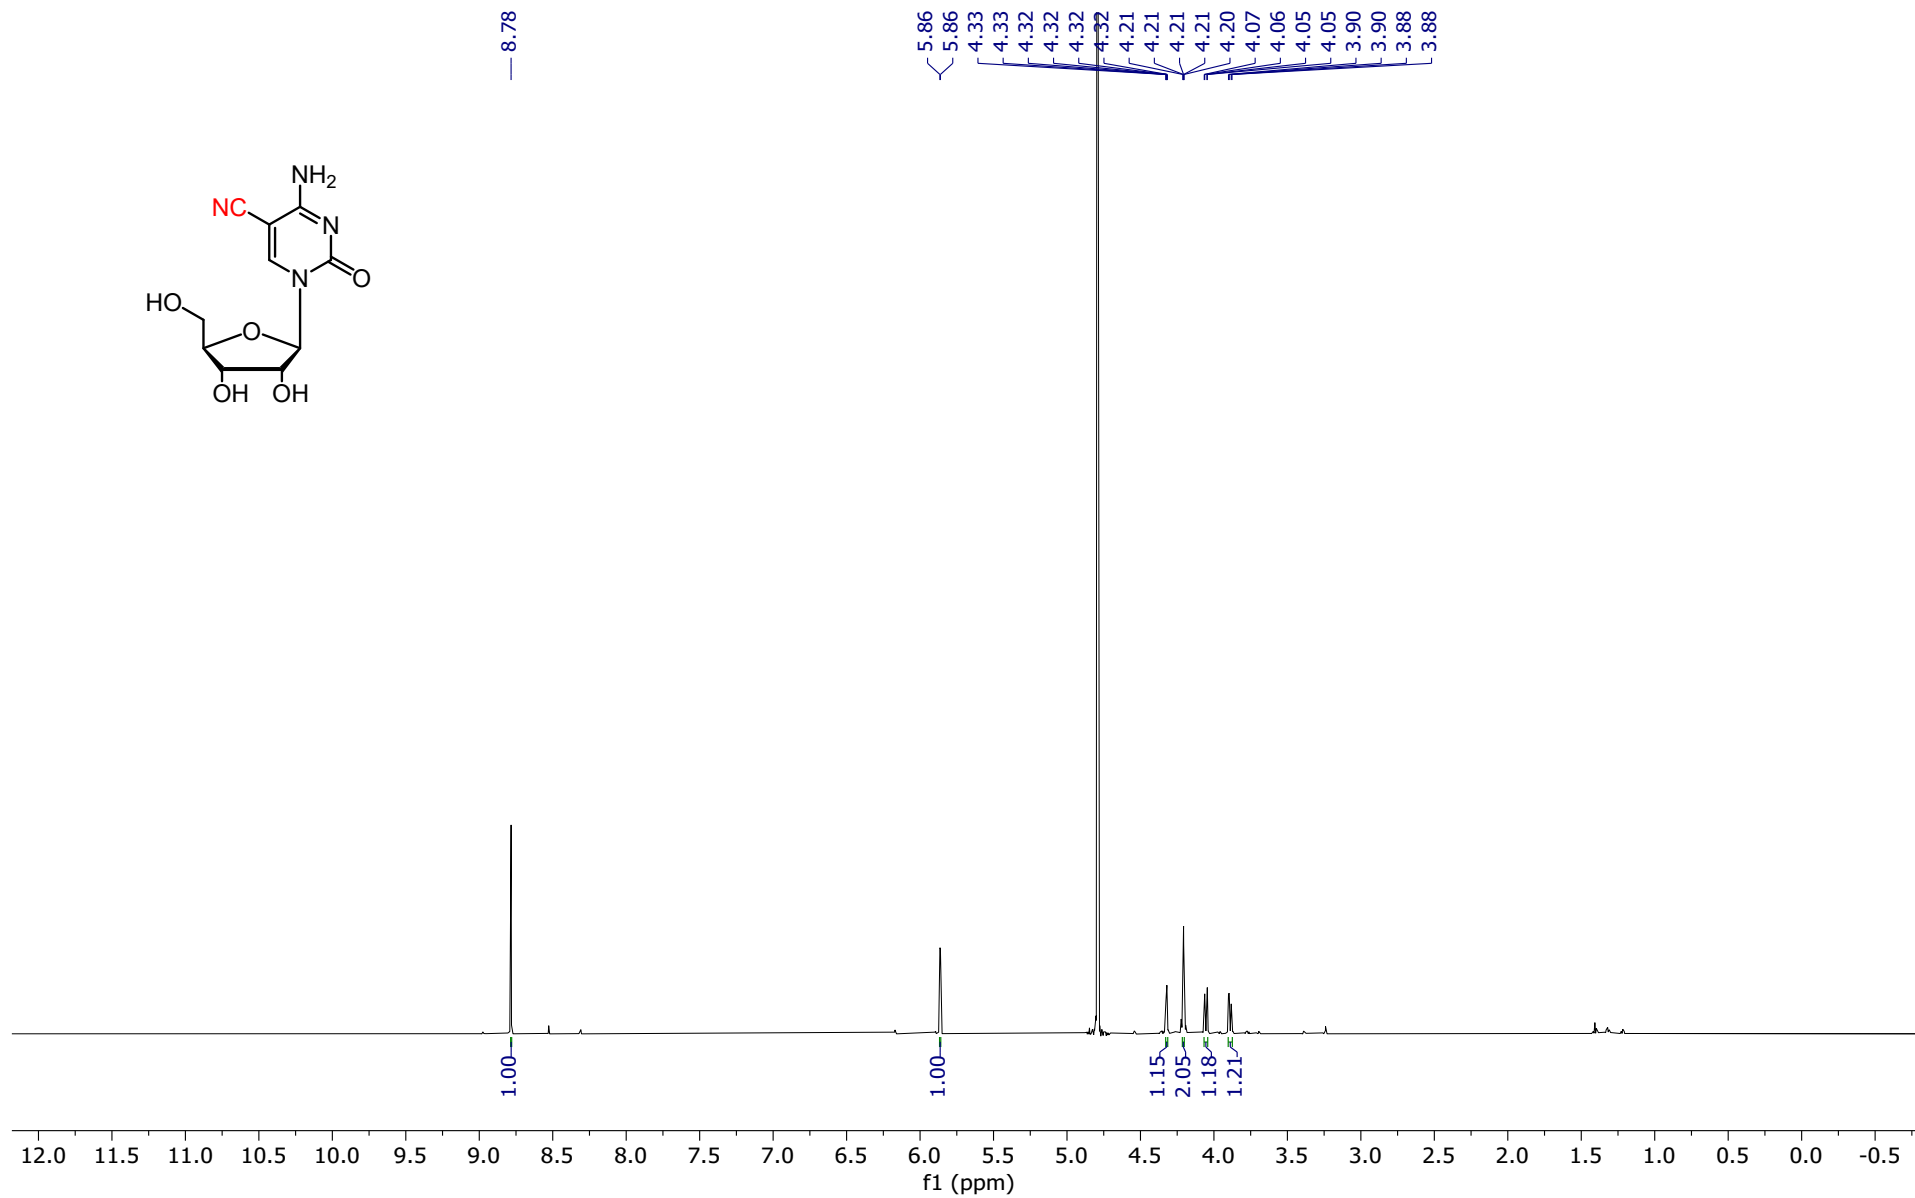

Figure S30. <sup>1</sup>H NMR spectrum of **5b** (700 MHz, D<sub>2</sub>O).

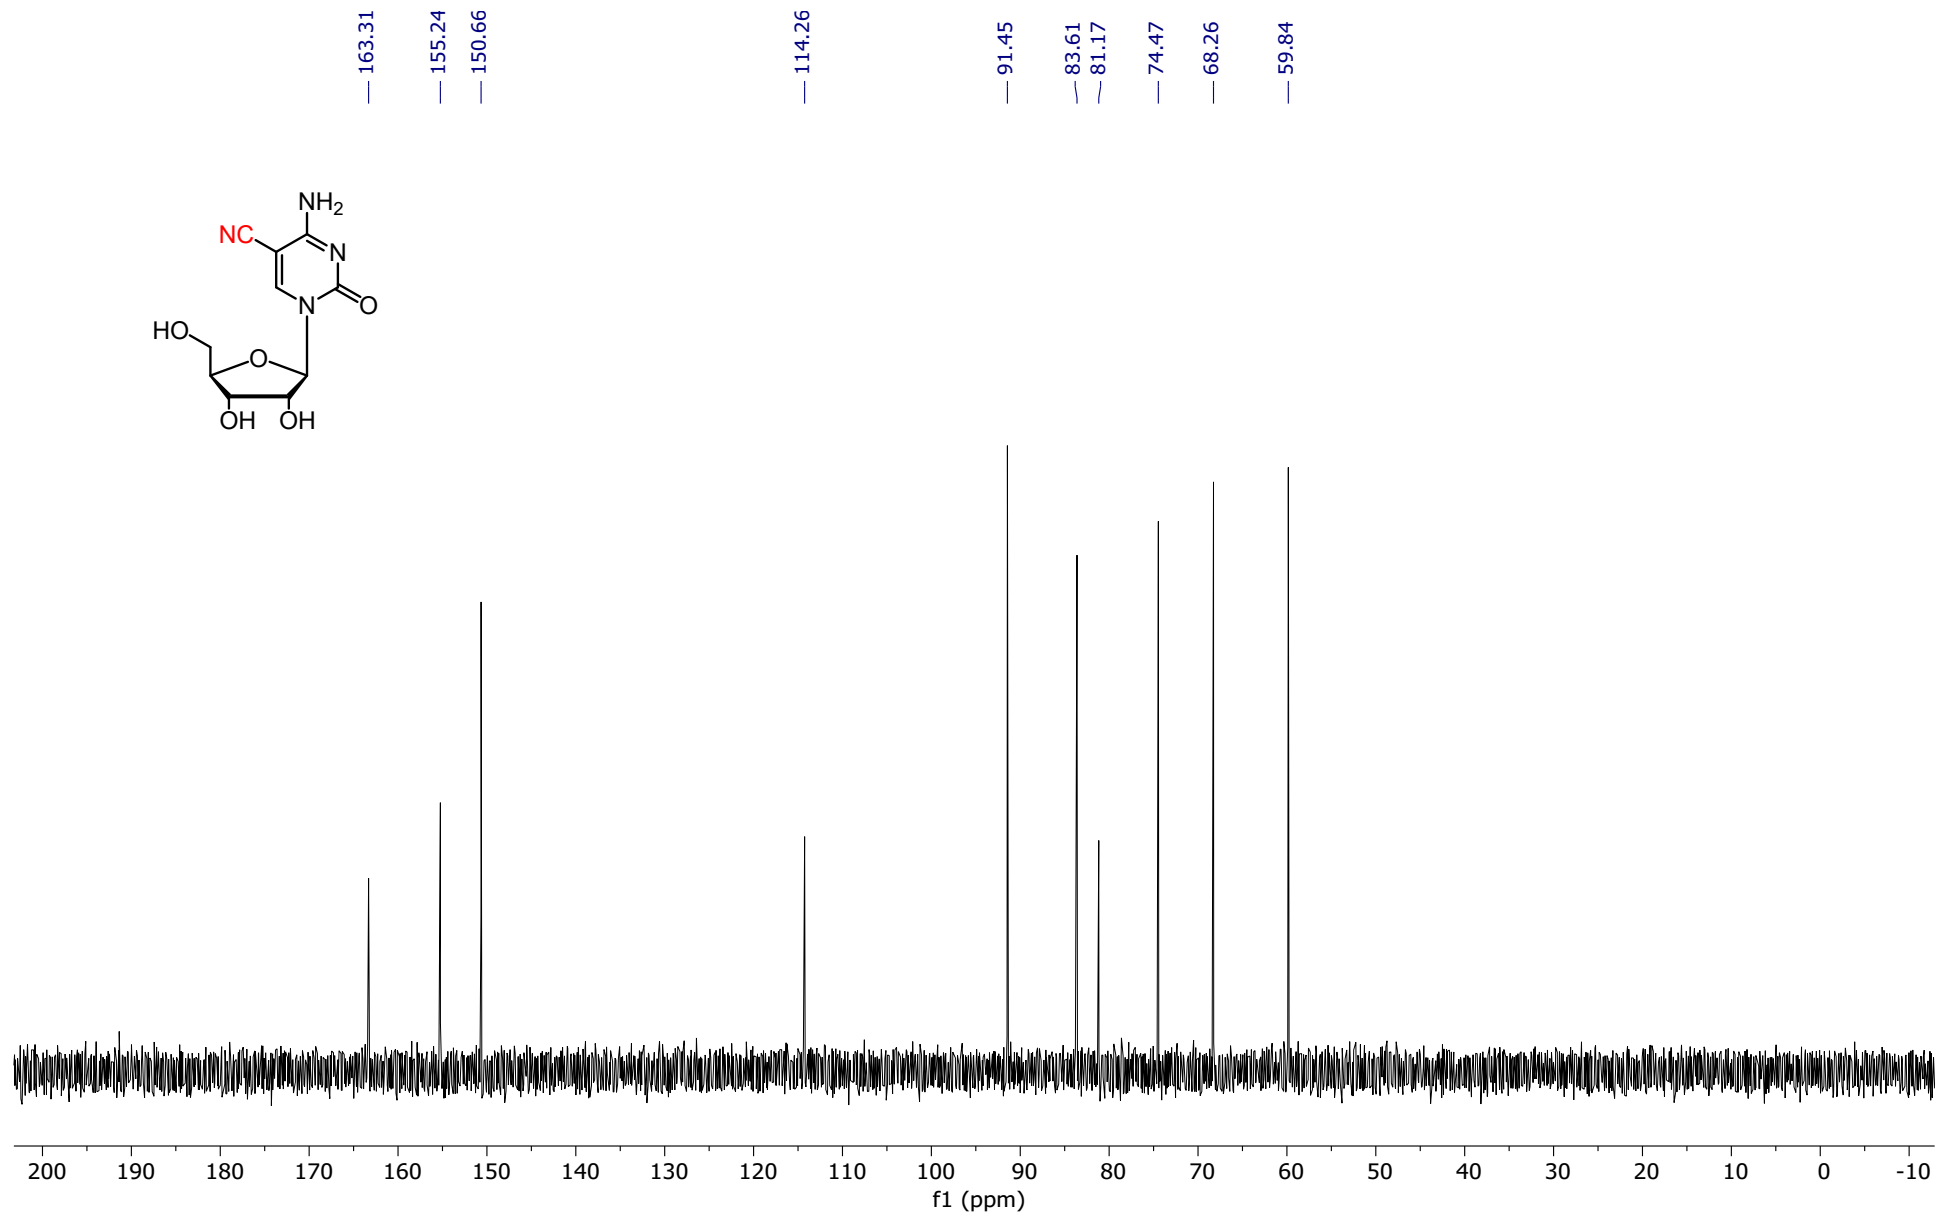

**Figure S31.** <sup>13</sup>C NMR spectrum of **5b** (176 MHz, D<sub>2</sub>O).



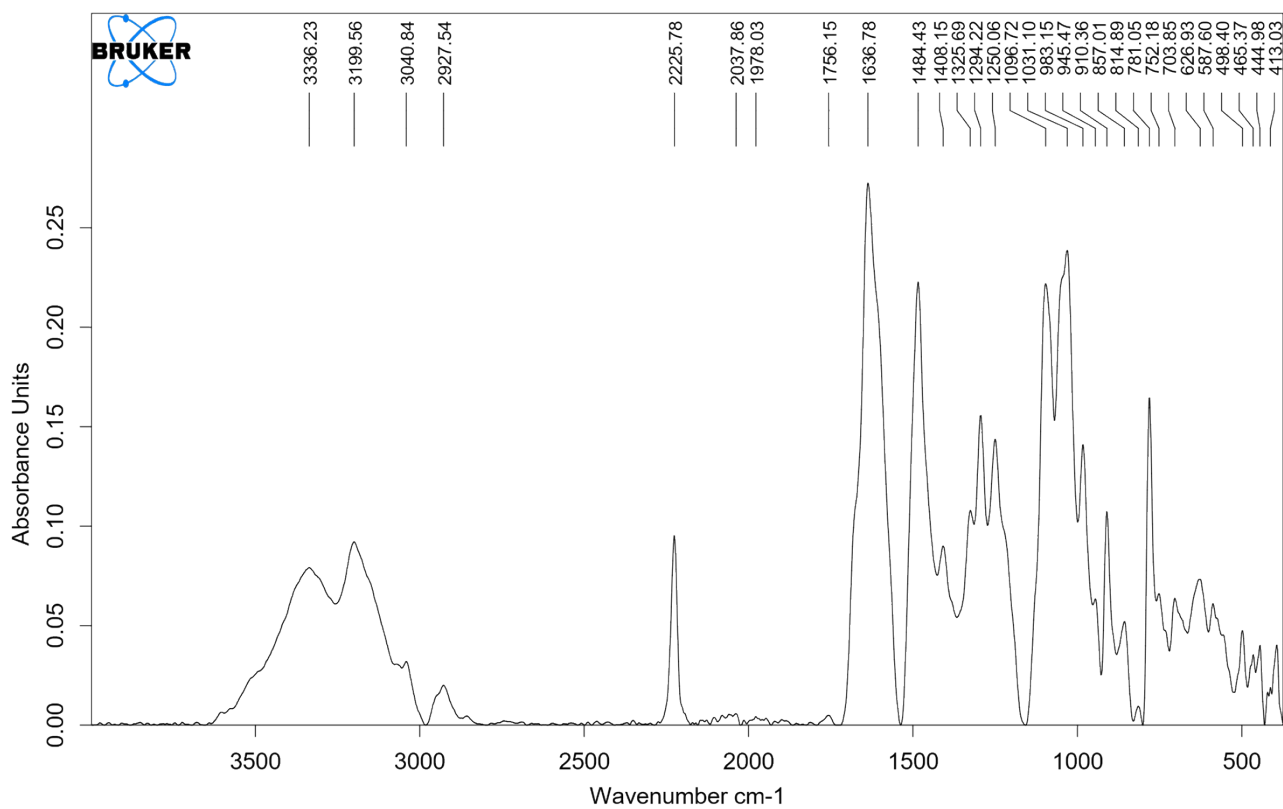

Figure S32. IR spectrum of 5-cyanocytidine (5b).

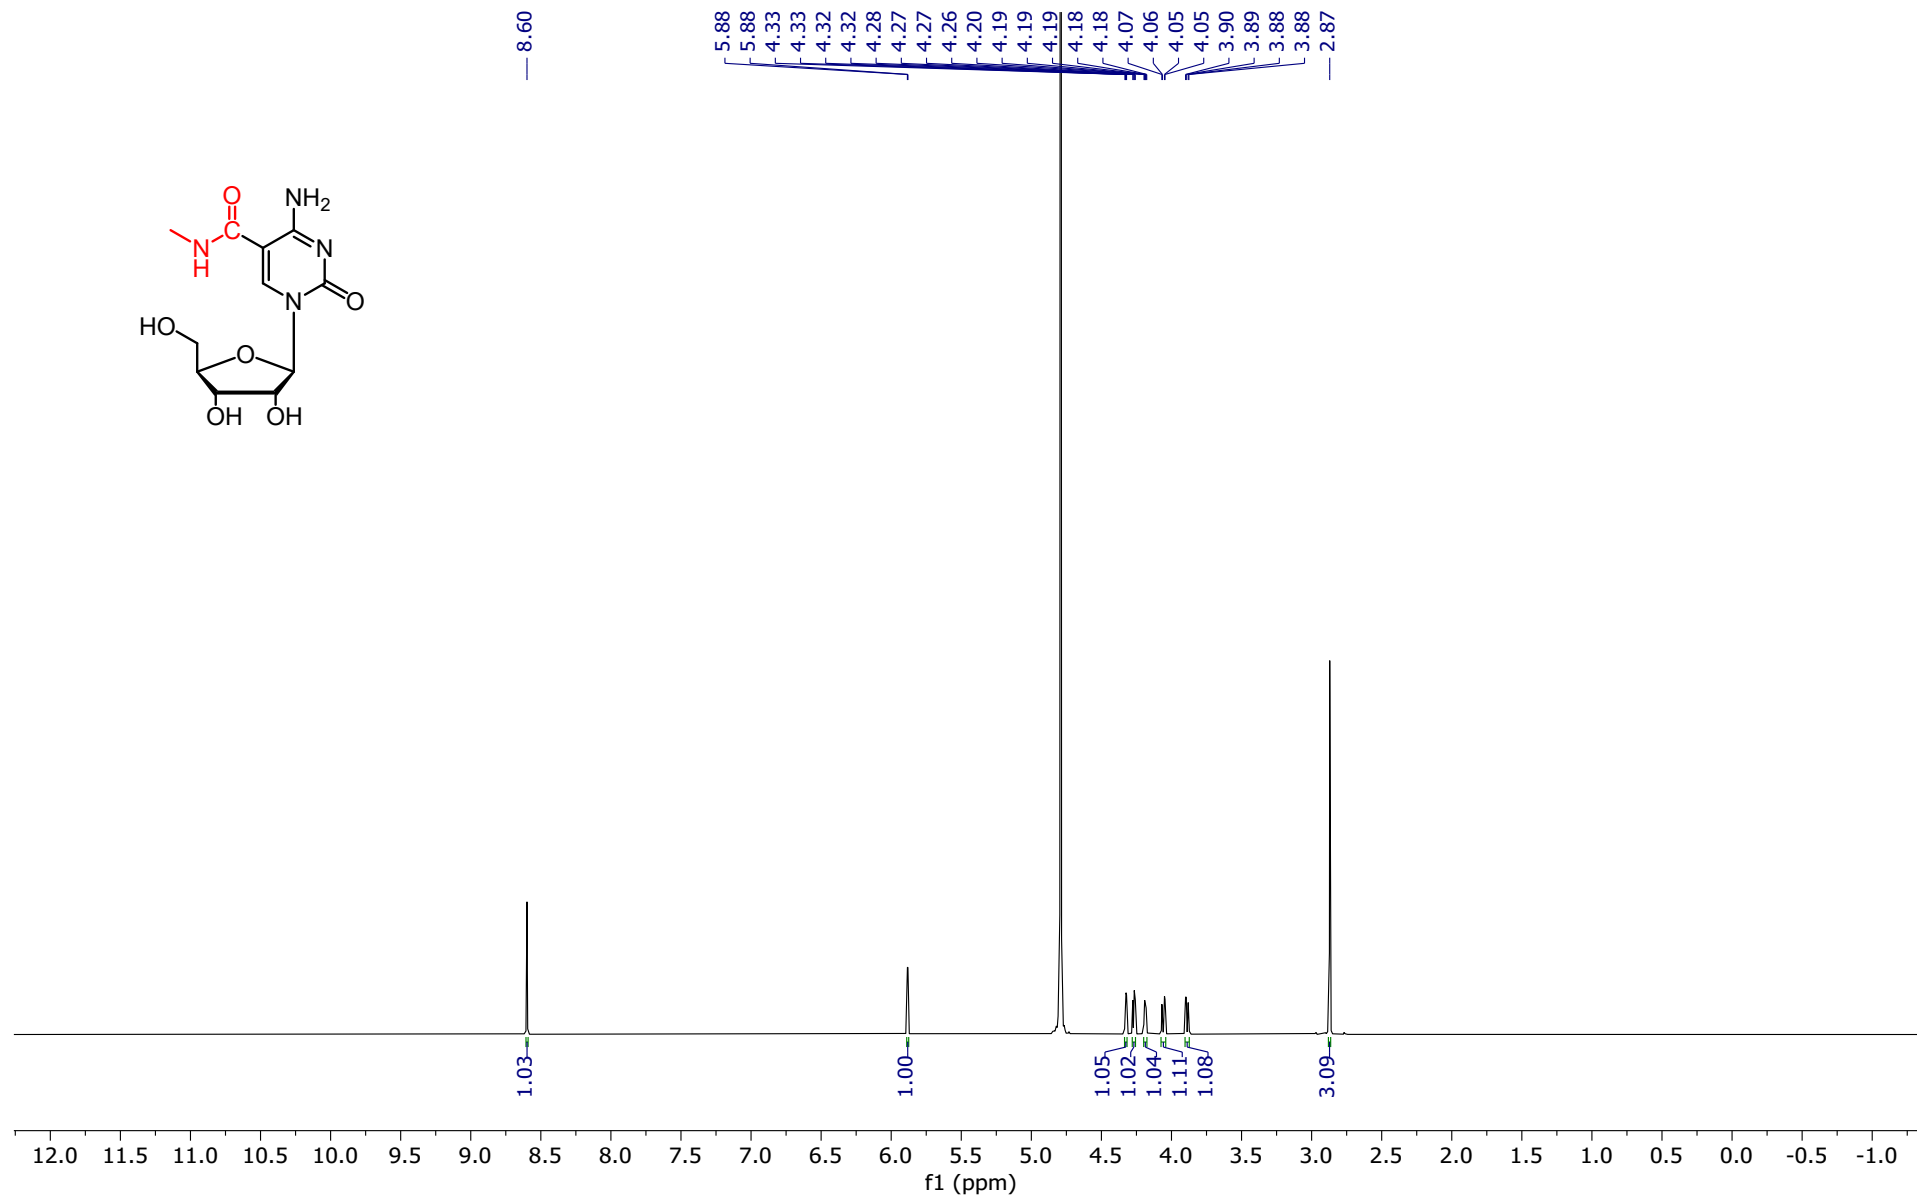

Figure S33. <sup>1</sup>H NMR spectrum of **6b** (700 MHz, D<sub>2</sub>O).

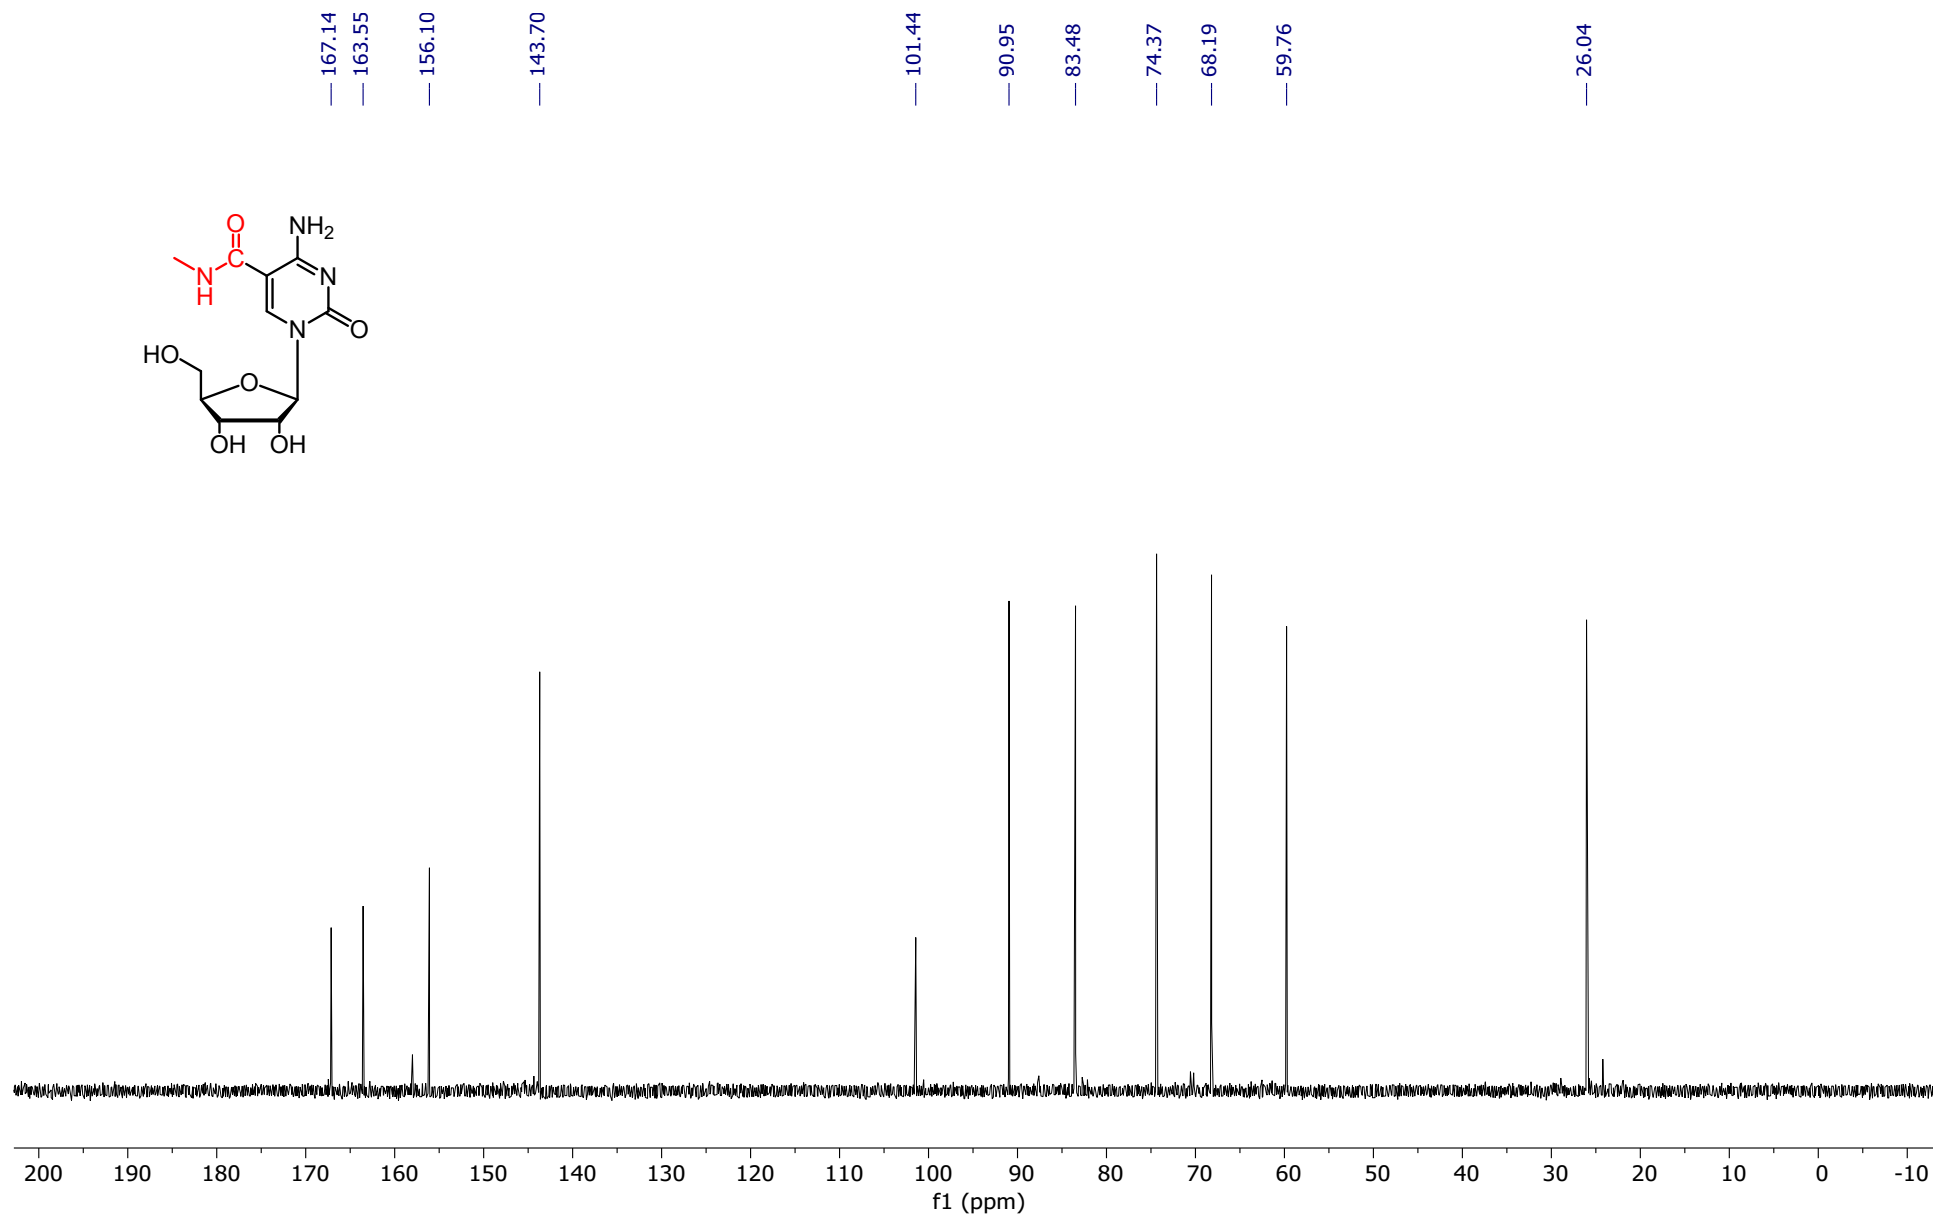

Figure S34. <sup>13</sup>C NMR spectrum of **6b** (176 MHz, D<sub>2</sub>O).

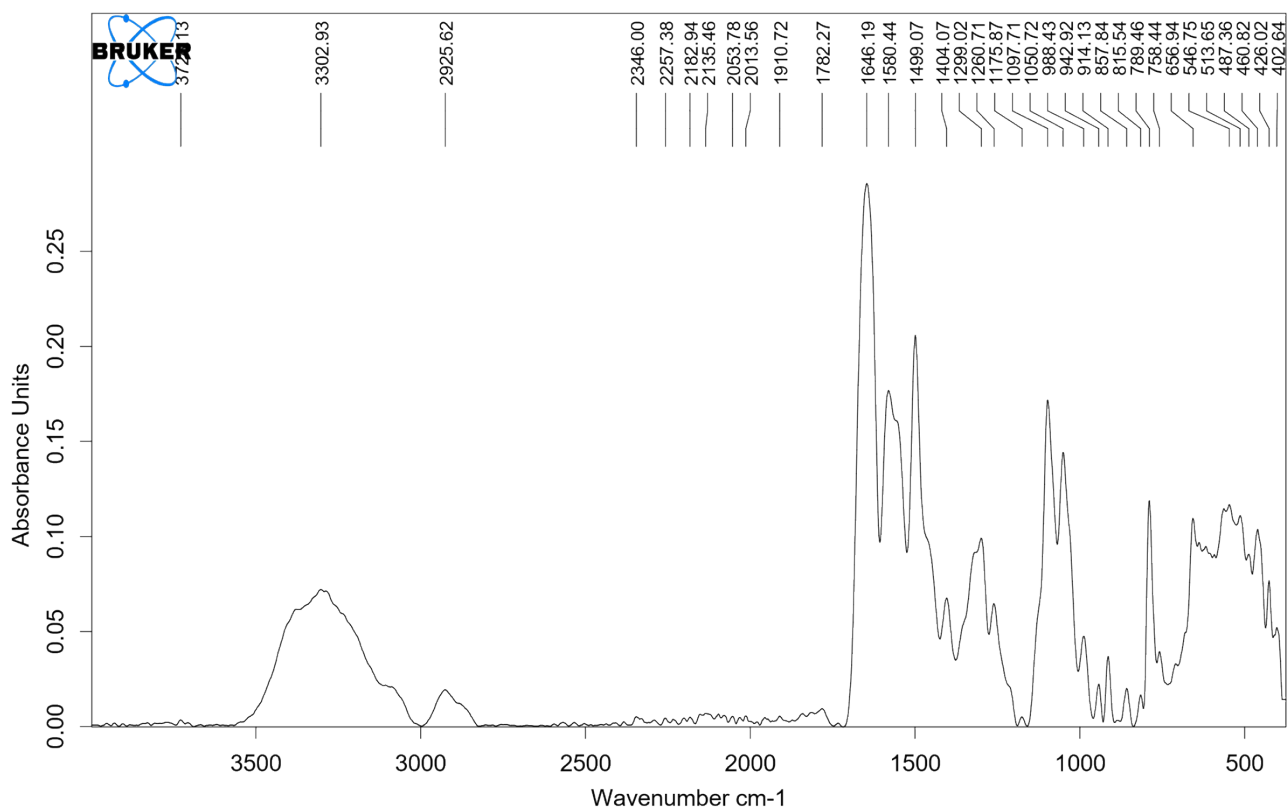

Figure S35. IR spectrum of 5-*N*-methylcarbamoylcytidine (**6b**).
